# Supplementary material for: Effects of the substituents of pyrazole/thiazine ligands on the magnetic properties of chloro-bridged Cu(ii) complexes
Source: Royal Society of Chemistry journal article supplement (doi:10.1039/c7nj01581j), 2017-01-01
Supplement: c7nj01581j1.pdf [file c7nj01581j1.pdf]

## Electronic Supplementary Information (ESI)

### Effects of the substituents of pyrazole/thiazine ligands on the magnetic properties of chloro-bridged Cu(II) complexes

Pablo Torres-García, Francisco Luna-Giles, Álvaro Bernalte-García, Carlos Platas-Iglesias, David Esteban-Gómez, and Emilio Viñuelas-Zahínos

|                                                                                                                                                                                                                                                                                              |    |
|----------------------------------------------------------------------------------------------------------------------------------------------------------------------------------------------------------------------------------------------------------------------------------------------|----|
| <b>Table S1.</b> Crystal data and structure refinement details for compounds $[\{\text{CuCl}(\text{PzTz})\}_2(\mu\text{-Cl})_2]$ , $[\{\text{CuCl}(\text{DMPzTz})\}_2(\mu\text{-Cl})_2]$ , $[\text{CuCl}_2(\text{DMPzTz})]$ and $[\{\text{CuCl}(\text{DPhPzTz})\}_2(\mu\text{-Cl})_2]$ ..... | 3  |
| <b>Table S2.</b> Comparison of bond lengths in complexes with the mean value calculated for similar compounds found in the Cambridge Structural Database .....                                                                                                                               | 5  |
| <b>Figure S1.</b> IR spectrum of $[\{\text{CuCl}(\text{PzTz})\}_2(\mu\text{-Cl})_2]$ in the 4000-370 $\text{cm}^{-1}$ range .....                                                                                                                                                            | 6  |
| <b>Figure S2.</b> IR spectrum of $[\{\text{CuCl}(\text{PzTz})\}_2(\mu\text{-Cl})_2]$ in the 500-150 $\text{cm}^{-1}$ range .....                                                                                                                                                             | 6  |
| <b>Figure S3.</b> IR spectrum of $[\{\text{CuCl}(\text{DMPzTz})\}_2(\mu\text{-Cl})_2]$ in the 4000-370 $\text{cm}^{-1}$ range.....                                                                                                                                                           | 7  |
| <b>Figure S4.</b> IR spectrum of $[\{\text{CuCl}(\text{DMPzTz})\}_2(\mu\text{-Cl})_2]$ in the 500-150 $\text{cm}^{-1}$ range.....                                                                                                                                                            | 7  |
| <b>Figure S5.</b> IR spectrum of $[\text{CuCl}_2(\text{DMPzTz})]$ in the 4000-370 $\text{cm}^{-1}$ range .....                                                                                                                                                                               | 8  |
| <b>Figure S6.</b> IR spectrum of $[\text{CuCl}_2(\text{DMPzTz})]$ in the 500-150 $\text{cm}^{-1}$ range .....                                                                                                                                                                                | 8  |
| <b>Figure S7.</b> IR spectrum of $[\{\text{CuCl}(\text{DPhPzTz})\}_2(\mu\text{-Cl})_2]$ in the 4000-370 $\text{cm}^{-1}$ range .....                                                                                                                                                         | 9  |
| <b>Figure S8.</b> IR spectrum of $[\{\text{CuCl}(\text{DPhPzTz})\}_2(\mu\text{-Cl})_2]$ in the 500-150 $\text{cm}^{-1}$ range .....                                                                                                                                                          | 9  |
| <b>Figure S9.</b> EPR spectrum of $[\{\text{CuCl}(\text{PzTz})\}_2(\mu\text{-Cl})_2]$ in the polycrystalline state at 298 K.....                                                                                                                                                             | 10 |
| <b>Figure S10.</b> EPR spectrum of $[\{\text{CuCl}(\text{DMPzTz})\}_2(\mu\text{-Cl})_2]$ in the polycrystalline state at 298 K.....                                                                                                                                                          | 10 |
| <b>Figure S11.</b> EPR spectrum of $[\text{CuCl}_2(\text{DMPzTz})]$ in the polycrystalline state at 298 K. ....                                                                                                                                                                              | 11 |
| <b>Figure S12.</b> EPR spectrum of $[\{\text{CuCl}(\text{DPhPzTz})\}_2(\mu\text{-Cl})_2]$ in the polycrystalline state at 298 K.....                                                                                                                                                         | 11 |
| <b>Figure S13.</b> EPR spectrum of $[\{\text{CuCl}(\text{PzTz})\}_2(\mu\text{-Cl})_2]$ in MeOH solution at 77 K .....                                                                                                                                                                        | 12 |
| <b>Figure S14.</b> EPR spectrum of $[\{\text{CuCl}(\text{DMPzTz})\}_2(\mu\text{-Cl})_2]$ in MeOH solution at 77 K.....                                                                                                                                                                       | 12 |
| <b>Figure S15.</b> EPR spectrum of $[\text{CuCl}_2(\text{DMPzTz})]$ in MeOH solution at 77 K .....                                                                                                                                                                                           | 13 |
| <b>Figure S16.</b> EPR spectrum of $[\{\text{CuCl}(\text{DPhPzTz})\}_2(\mu\text{-Cl})_2]$ in MeOH solution at 77 K .....                                                                                                                                                                     | 13 |
| <b>Figure S17.</b> Experimental $\chi_M T$ vs $T$ data for $[\{\text{CuCl}(\text{PzTz})\}_2(\mu\text{-Cl})_2]$ . Solid line represents the best fit of the data with the model described in the text.....                                                                                    | 14 |
| <b>Figure S18.</b> Structure of the <i>cis</i> - $[\{\text{CuCl}(\text{DPhPzTz})\}_2(\mu\text{-Cl})_2]$ complex optimized at the TPSSh/TZVP level highlighting the short H···H distances involving the phenyl and thiazine moieties. ....                                                    | 14 |

|                                                                                                                                                                                                                     |    |
|---------------------------------------------------------------------------------------------------------------------------------------------------------------------------------------------------------------------|----|
| <b>Table S3.</b> Coupling constant and magnetostructural correlation parameters for selected bis( $\mu$ -chloro) copper(II) dimers.....                                                                             | 15 |
| <b>Table S4.</b> Comparison of experimental (X-ray) and calculated (TPSSh/TZVP) bond distances of the metal coordination environments in $[\text{CuCl}_2\text{L}]$ systems .....                                    | 16 |
| <b>Table S5.</b> Comparison of experimental (X-ray) and calculated (TPSSh/TZVP) bond distances of the metal coordination environments in <i>cis</i> - $[\text{CuCl}(\mu\text{-Cl})_2]$ systems .....                | 17 |
| <b>Table S6.</b> Comparison of experimental (X-ray) and calculated (TPSSh/TZVP) bond distances of the metal coordination environments in <i>trans</i> - $[\text{CuCl}(\mu\text{-Cl})_2]$ systems.....               | 17 |
| <b>Table S7.</b> Comparison of experimental and calculated exchange coupling constants [ $J$ , $\text{cm}^{-1}$ ] of the <i>cis</i> and <i>trans</i> isomers of $[\text{CuCl}(\text{PzTz})](\mu\text{-Cl}_2)$ ..... | 18 |
| <b>Table S8.</b> Optimized Cartesian coordinates ( $\text{\AA}$ ) calculated for $[\text{CuCl}_2(\text{PzTz})]$ (TPSSh/TZVP; PCM = methanol; 0 Imaginary frequencies) .....                                         | 18 |
| <b>Table S9.</b> Optimized Cartesian coordinates ( $\text{\AA}$ ) calculated for $[\text{CuCl}_2(\text{DMPzTz})]$ (TPSSh/TZVP; PCM = methanol; 0 Imaginary frequencies) .....                                       | 19 |
| <b>Table S10.</b> Optimized Cartesian coordinates ( $\text{\AA}$ ) calculated for $[\text{CuCl}_2(\text{DPhPzTz})]$ (TPSSh/TZVP; PCM = methanol; 0 Imaginary frequencies) .....                                     | 20 |
| <b>Table S11.</b> Optimized Cartesian coordinates ( $\text{\AA}$ ) calculated for <i>cis</i> - $[\{\text{CuCl}(\text{PzTz})\}_2(\mu\text{-Cl}_2)]$ (TPSSh/TZVP; PCM = methanol; 0 Imaginary frequencies) .....      | 21 |
| <b>Table S12.</b> Optimized Cartesian coordinates ( $\text{\AA}$ ) calculated for <i>trans</i> - $[\{\text{CuCl}(\text{PzTz})\}_2(\mu\text{-Cl}_2)]$ (TPSSh/TZVP; PCM = methanol; 0 Imaginary frequencies).....     | 22 |
| <b>Table S13.</b> Optimized Cartesian coordinates ( $\text{\AA}$ ) calculated for <i>cis</i> - $[\{\text{CuCl}(\text{DMPzTz})\}_2(\mu\text{-Cl}_2)]$ (TPSSh/TZVP; PCM = methanol; 0 Imaginary frequencies).....     | 23 |
| <b>Table S14.</b> Optimized Cartesian coordinates ( $\text{\AA}$ ) calculated for <i>trans</i> - $[\{\text{CuCl}(\text{DMPzTz})\}_2(\mu\text{-Cl}_2)]$ (TPSSh/TZVP; PCM = methanol; 0 Imaginary frequencies).....   | 24 |
| <b>Table S15.</b> Optimized Cartesian coordinates ( $\text{\AA}$ ) calculated for <i>cis</i> - $[\{\text{CuCl}(\text{DPhPzTz})\}_2(\mu\text{-Cl}_2)]$ (TPSSh/TZVP; PCM = methanol; 0 Imaginary frequencies).....    | 25 |
| <b>Table S16.</b> Optimized Cartesian coordinates ( $\text{\AA}$ ) calculated for <i>trans</i> - $[\{\text{CuCl}(\text{DPhPzTz})\}_2(\mu\text{-Cl}_2)]$ (TPSSh/TZVP; PCM = methanol; 0 Imaginary frequencies).....  | 27 |

Table S1. Crystal data and structure refinement details for compounds  $[\{\text{CuCl}(\text{PzTz})\}_2(\mu\text{-Cl})_2]$ ,  $[\{\text{CuCl}(\text{DMPzTz})\}_2(\mu\text{-Cl})_2]$ ,  $[\text{CuCl}_2(\text{DMPzTz})]$  and  $[\{\text{CuCl}(\text{DPhPzTz})\}_2(\mu\text{-Cl})_2]$

|                                                | $[\{\text{CuCl}(\text{PzTz})\}_2(\mu\text{-Cl})_2]$                    | $[\{\text{CuCl}(\text{DMPzTz})\}_2(\mu\text{-Cl})_2]$                  | $[\text{CuCl}_2(\text{DMPzTz})]$                         | $[\{\text{CuCl}(\text{DPhPzTz})\}_2(\mu\text{-Cl})_2]$                 |
|------------------------------------------------|------------------------------------------------------------------------|------------------------------------------------------------------------|----------------------------------------------------------|------------------------------------------------------------------------|
| Crystal shape                                  | Prism                                                                  | Prism                                                                  | Prism                                                    | Needle                                                                 |
| Colour                                         | Green                                                                  | Green                                                                  | Dark green                                               | Green                                                                  |
| Size (mm)                                      | 0.30 × 0.26 × 0.24                                                     | 0.24 × 0.17 × 0.16                                                     | 0.48 × 0.46 × 0.35                                       | 0.29 × 0.05 × 0.03                                                     |
| Chemical formula                               | $\text{C}_{14}\text{H}_{18}\text{Cl}_4\text{Cu}_2\text{N}_6\text{S}_2$ | $\text{C}_{18}\text{H}_{26}\text{Cl}_4\text{Cu}_2\text{N}_6\text{S}_2$ | $\text{C}_9\text{H}_{13}\text{Cl}_2\text{CuN}_3\text{S}$ | $\text{C}_{38}\text{H}_{34}\text{Cl}_4\text{Cu}_2\text{N}_6\text{S}_2$ |
| Formula weight                                 | 603.34                                                                 | 659.45                                                                 | 329.72                                                   | 907.71                                                                 |
| Crystal system                                 | Monoclinic                                                             | Monoclinic                                                             | Orthorhombic                                             | Monoclinic                                                             |
| Space group                                    | C2/c                                                                   | C2/c                                                                   | Pbca                                                     | P2 <sub>1</sub> /n                                                     |
| <i>Unit cell dimensions</i>                    |                                                                        |                                                                        |                                                          |                                                                        |
| <i>a</i> (Å)                                   | 17.2598(4)                                                             | 17.3533(6)                                                             | 7.5613(3)                                                | 6.340(5)                                                               |
| <i>b</i> (Å)                                   | 8.9759(7)                                                              | 9.0977(3)                                                              | 17.6501(7)                                               | 15.756(5)                                                              |
| <i>c</i> (Å)                                   | 14.2902(12)                                                            | 17.7828(6)                                                             | 18.5075(7)                                               | 19.015(5)                                                              |
| $\beta$ (°)                                    | 106.600(1)                                                             | 118.7020(10)                                                           |                                                          | 98.637(5)                                                              |
| Cell volume (Å <sup>3</sup> )                  | 2121.6(3)                                                              | 2462.51(15)                                                            | 2469.97(17)                                              | 1877.9(17)                                                             |
| <i>Z</i>                                       | 4                                                                      | 4                                                                      | 8                                                        | 2                                                                      |
| <i>T</i> (K)                                   | 298(2)                                                                 | 100(2)                                                                 | 100(2)                                                   | 110(2)                                                                 |
| <i>D</i> <sub>calc</sub> (g cm <sup>-3</sup> ) | 1.889                                                                  | 1.779                                                                  | 1.773                                                    | 1.605                                                                  |
| $\mu$ (mm <sup>-1</sup> )                      | 2.720                                                                  | 2.352                                                                  | 2.344                                                    | 1.567                                                                  |
| <i>F</i> (000)                                 | 1208                                                                   | 1336                                                                   | 1336                                                     | 924                                                                    |

|                                                   |                                                                        |                                                                    |                                                                 |                                                                  |
|---------------------------------------------------|------------------------------------------------------------------------|--------------------------------------------------------------------|-----------------------------------------------------------------|------------------------------------------------------------------|
| $\theta$ range                                    | 2.46 – 28.22                                                           | 2.61 – 26.42                                                       | 2.20 – 26.41                                                    | 1.69 – 26.41                                                     |
| Index range                                       | -22 $\leq$ h $\leq$ 22, -11 $\leq$ k $\leq$ 11, -18 $\leq$ l $\leq$ 18 | -21 $\leq$ h $\leq$ 18, 0 $\leq$ k $\leq$ 11, 0 $\leq$ l $\leq$ 22 | 0 $\leq$ h $\leq$ 9, 0 $\leq$ k $\leq$ 22, 0 $\leq$ l $\leq$ 23 | -7 $\leq$ h $\leq$ 7, 0 $\leq$ k $\leq$ 19, 0 $\leq$ l $\leq$ 23 |
| Independent reflections                           | 2482                                                                   | 2532                                                               | 2533                                                            | 3829                                                             |
| Observed reflections<br>[ $F > 4,0 \sigma(F)$ ]   | 2300                                                                   | 2228                                                               | 2367                                                            | 3100                                                             |
| No. of ref. parameters                            | 127                                                                    | 147                                                                | 147                                                             | 235                                                              |
| $R$ [ $F > 4,0 \sigma(F)$ ]                       | 0.0396                                                                 | 0.0228                                                             | 0.0204                                                          | 0.0504                                                           |
| $wR$ [ $F > 4,0 \sigma(F)$ ]                      | 0.1001                                                                 | 0.0517                                                             | 0.0535                                                          | 0.138                                                            |
| Goodness-of-fit (GOF)                             | 1.111                                                                  | 1.022                                                              | 1.169                                                           | 1.133                                                            |
| $\rho_{\max}; \rho_{\min}$ (e $\text{\AA}^{-3}$ ) | 1.422; -0.453                                                          | 0.339; -0.415                                                      | 0.281; -0.585                                                   | 1.433; -0.839                                                    |

Table S2. Comparison of bond lengths in complexes with the mean value calculated for similar compounds found in the Cambridge Structural Database

|                           | <b>[[CuCl(PzTz)]<sub>2</sub>(μ-Cl)<sub>2</sub>]</b> | <b>[[CuCl(DMPzTz)]<sub>2</sub>(μ-Cl)<sub>2</sub>]</b> | <b>[[[CuCl(DPhPzTz)]<sub>2</sub>(μ-Cl)<sub>2</sub>]</b> | <b>Mean value</b>        | <b>[CuCl<sub>2</sub>(DMPzTz)]</b> | <b>Mean value</b>      |
|---------------------------|-----------------------------------------------------|-------------------------------------------------------|---------------------------------------------------------|--------------------------|-----------------------------------|------------------------|
| Cu-N(1)                   | 2.050(3)                                            | 1.998(2)                                              | 2.022(3)                                                | 1.97(7) <sup>[b]</sup>   | 1.985(1)                          | 1.97(7) <sup>[b]</sup> |
| Cu-N(3)                   | 1.988(3)                                            | 2.029(2)                                              | 2.026(3)                                                | 1.942(13) <sup>[c]</sup> | 1.993(2)                          | 1.98(4) <sup>[e]</sup> |
| Cu-Cl(1)                  | 2.292(1)                                            | 2.273(1)                                              | 2.282(1)                                                | 2.29(4) <sup>[d]</sup>   | 2.237(1)                          | 2.24(2) <sup>[f]</sup> |
| Cu-Cl(1a) <sup>[a]</sup>  | 2.795(1)                                            | 2.580(1)                                              | 2.675(2)                                                | 2.70(15) <sup>[d]</sup>  |                                   |                        |
| Cu-Cl(2)                  | 2.227(1)                                            | 2.264(1)                                              | 2.244(1)                                                | 2.27(5) <sup>[d]</sup>   | 2.203(1)                          | 2.24(2)                |
| Cu...Cu(a) <sup>[a]</sup> | 3.538(1)                                            | 3.460(1)                                              | 3.588(2)                                                | 3.55(15) <sup>[d]</sup>  |                                   |                        |

<sup>[a]</sup> Symmetry code: 0.5-x, 0.5-y, -z for [[CuCl(PzTz)]<sub>2</sub>(μ-Cl)<sub>2</sub>] and [[CuCl(DMPzTz)]<sub>2</sub>(μ-Cl)<sub>2</sub>]; 1-x, 1-y, -z for [[CuCl(DPhPzTz)]<sub>2</sub>(μ-Cl)<sub>2</sub>]

<sup>[b]</sup> Calculated average value for 9 copper(II) complexes with this bond Cu-N<sub>thiazine</sub>

<sup>[c]</sup> Calculated average value for 7 five-coordinated copper(II) complexes with this type of unions containing the chromophore group CuCl<sub>3</sub>N<sub>2</sub>

<sup>[d]</sup> Calculated mean value using the data of 192 dichlorine-bridged dimers of copper(II) with a Cl<sub>3</sub>N<sub>2</sub> environment

<sup>[e]</sup> Calculated average value for 6 four-coordinated copper(II) complexes with this type of unions containing the chromophore group CuCl<sub>2</sub>N<sub>2</sub>

<sup>[f]</sup> Calculated average value for 105 *cis*-squared planar copper(II) complexes the chromophore group CuCl<sub>2</sub>N<sub>2</sub>

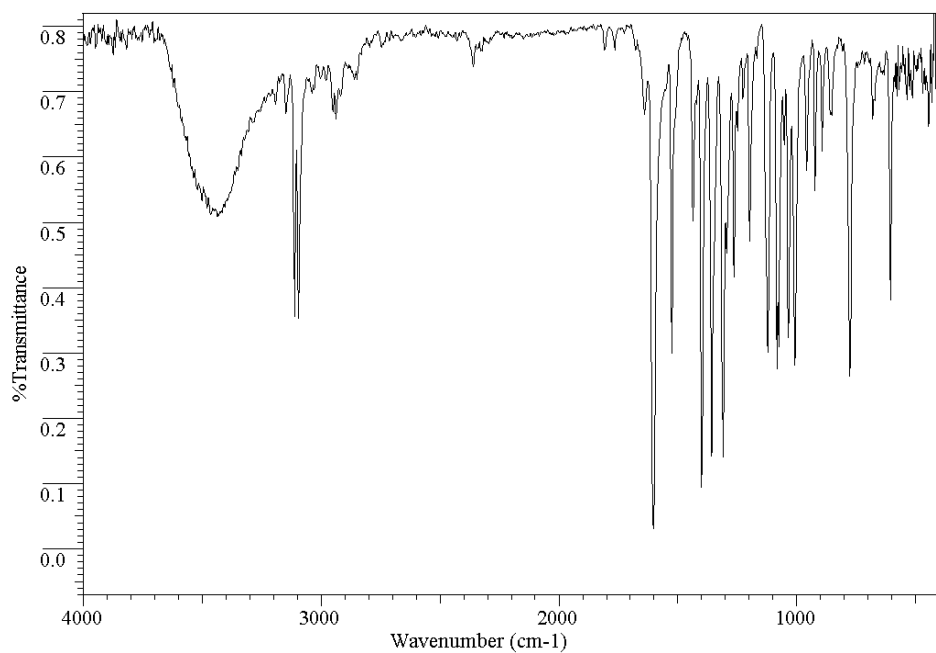

Figure S1. IR spectrum of  $[\{\text{CuCl}(\text{PzTz})\}_2(\mu\text{-Cl})_2]$  in the  $4000\text{-}370\text{ cm}^{-1}$  range

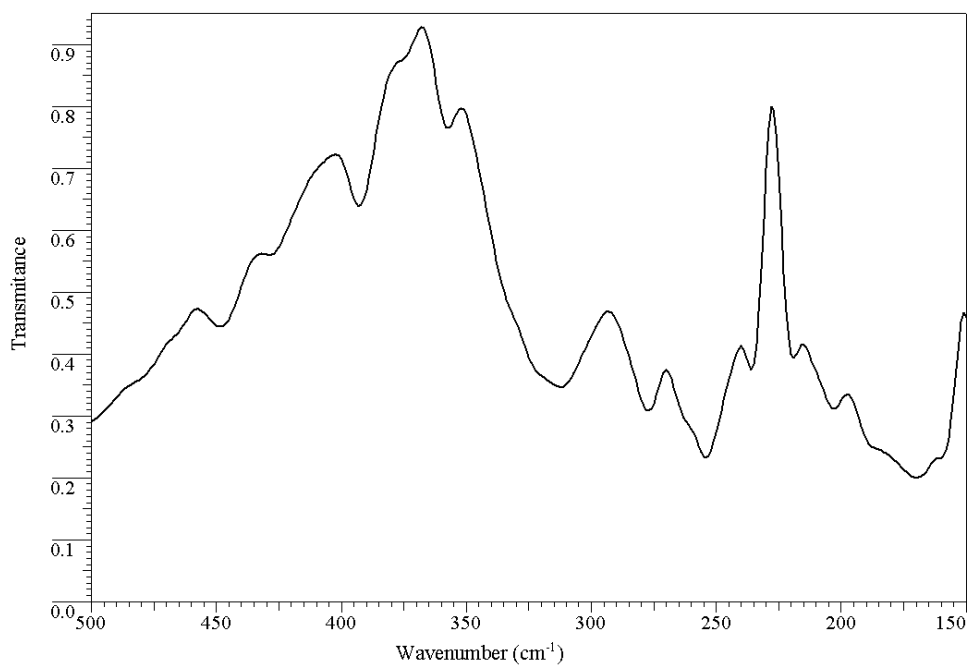

Figure S2. IR spectrum of  $[\{\text{CuCl}(\text{PzTz})\}_2(\mu\text{-Cl})_2]$  in the  $500\text{-}150\text{ cm}^{-1}$  range

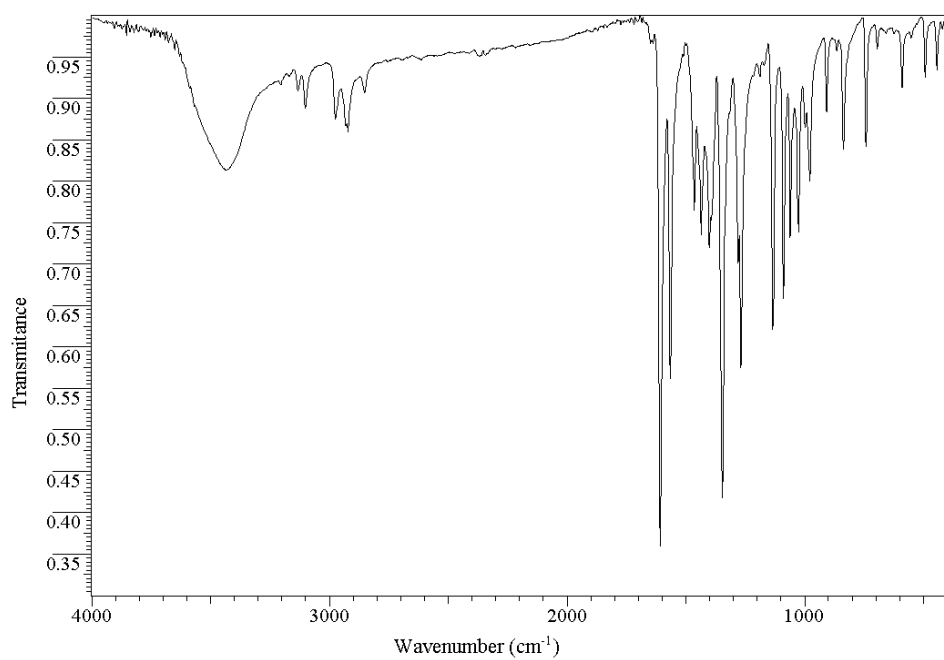

Figure S3. IR spectrum of  $[\{\text{CuCl}(\text{DMPzTz})\}_2(\mu\text{-Cl})_2]$  in the 4000-370  $\text{cm}^{-1}$  range

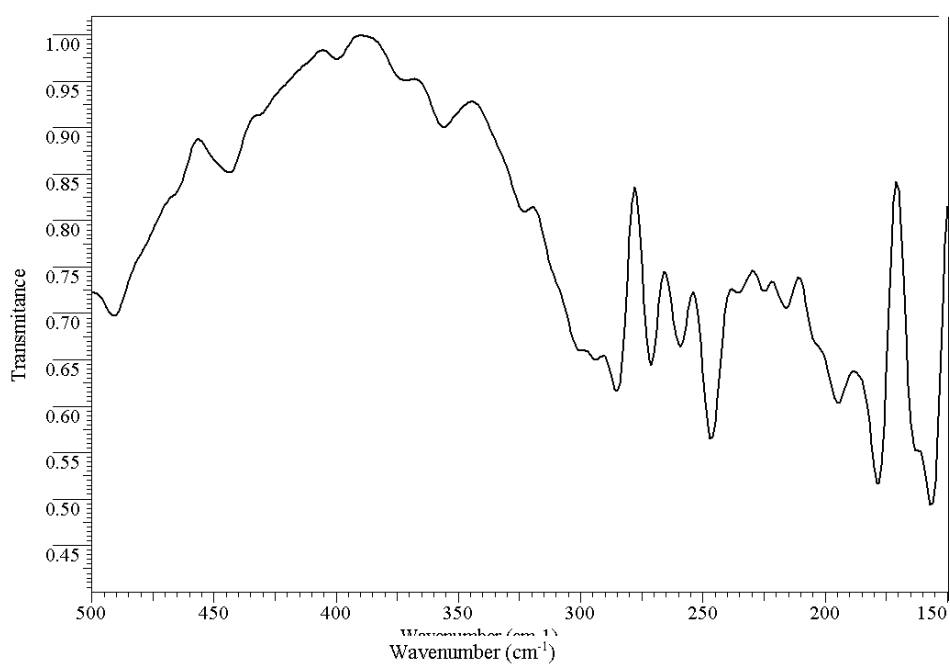

Figure S4. IR spectrum of  $[\{\text{CuCl}(\text{DMPzTz})\}_2(\mu\text{-Cl})_2]$  in the 500-150  $\text{cm}^{-1}$  range

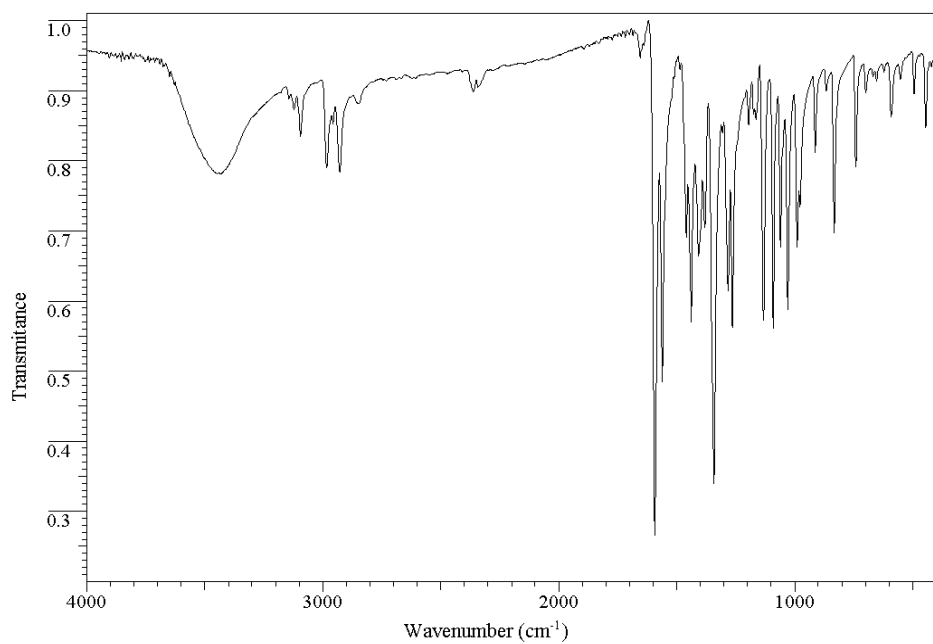

Figure S5. IR spectrum of  $[\text{CuCl}_2(\text{DMPzTz})]$  in the  $4000\text{-}370\text{ cm}^{-1}$  range

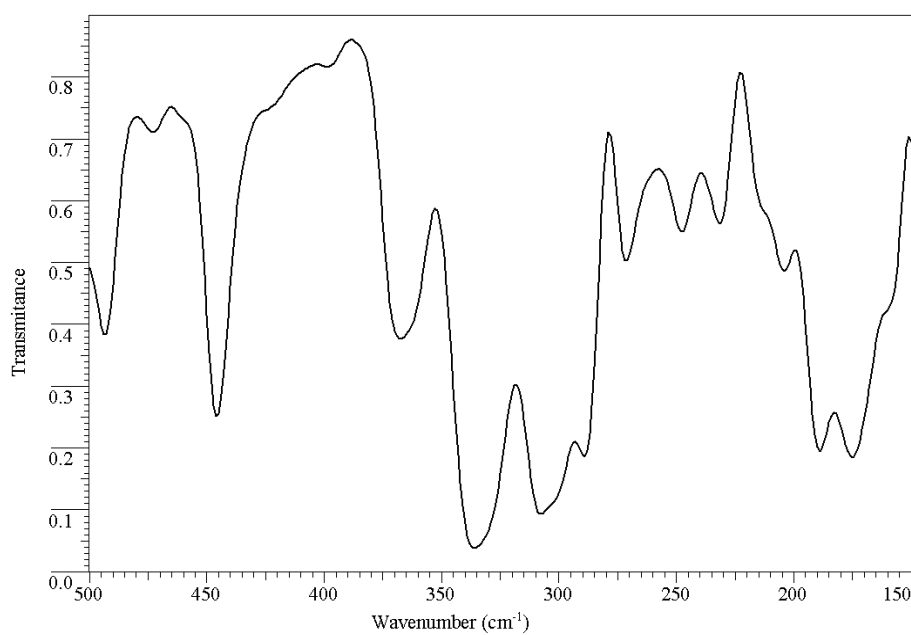

Figure S6. IR spectrum of  $[\text{CuCl}_2(\text{DMPzTz})]$  in the  $500\text{-}150\text{ cm}^{-1}$  range



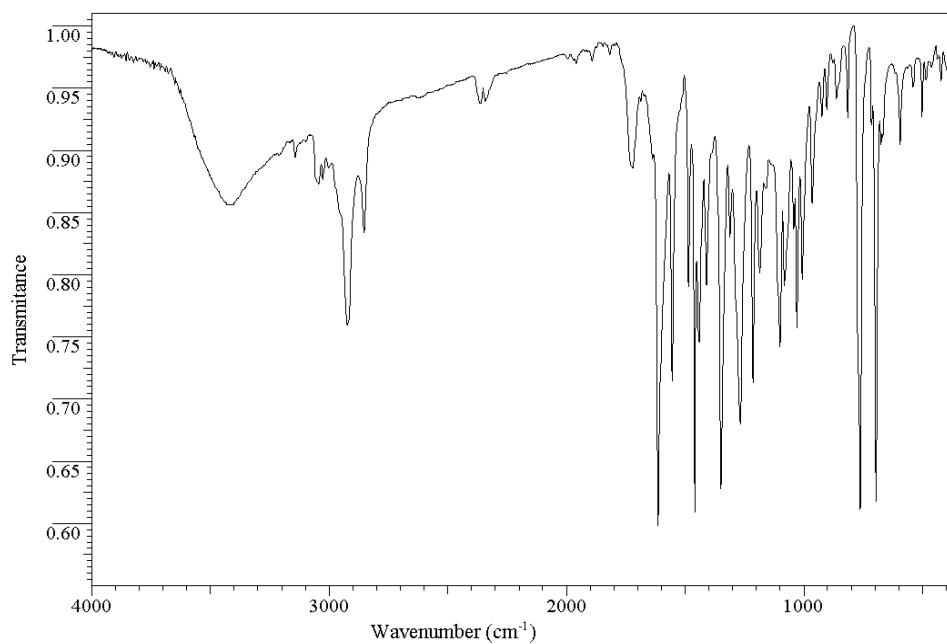

Figure S7. IR spectrum of  $[\{\text{CuCl}(\text{DPhPzTz})\}_2(\mu\text{-Cl})_2]$  in the 4000-370  $\text{cm}^{-1}$  range

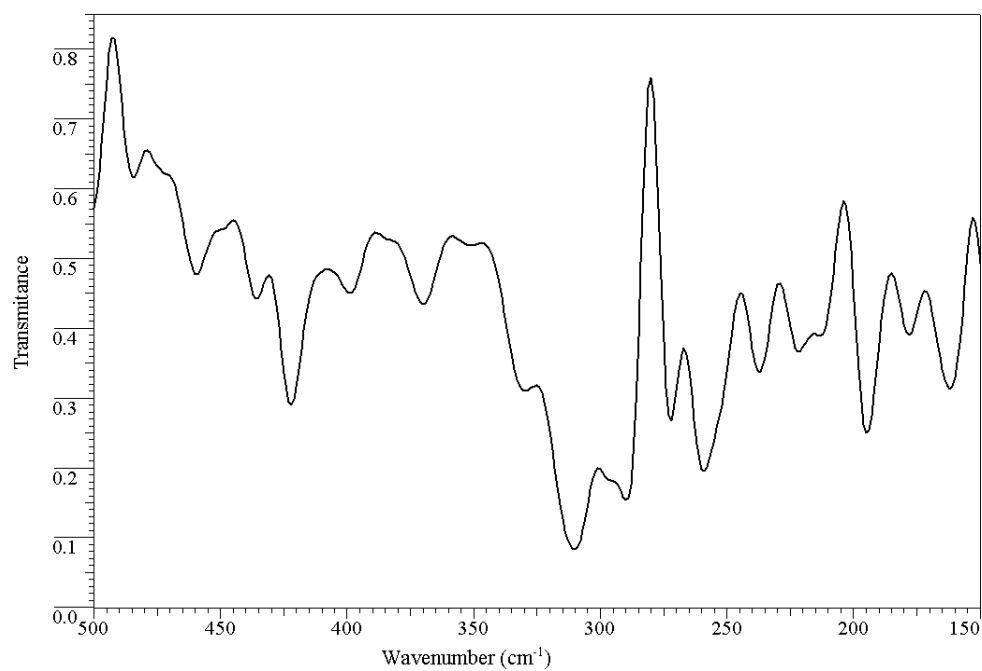

Figure S8. IR spectrum of  $[\{\text{CuCl}(\text{DPhPzTz})\}_2(\mu\text{-Cl})_2]$  in the 500-150  $\text{cm}^{-1}$  range

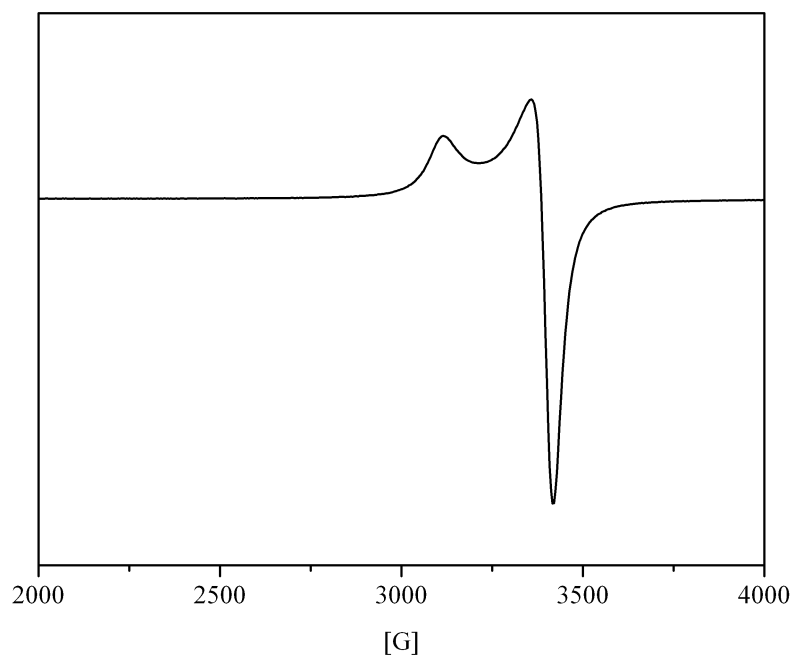

Figure S9. EPR spectrum of  $[\{\text{CuCl}(\text{PzTz})\}_2(\mu\text{-Cl})_2]$  in the polycrystalline state at 298 K.

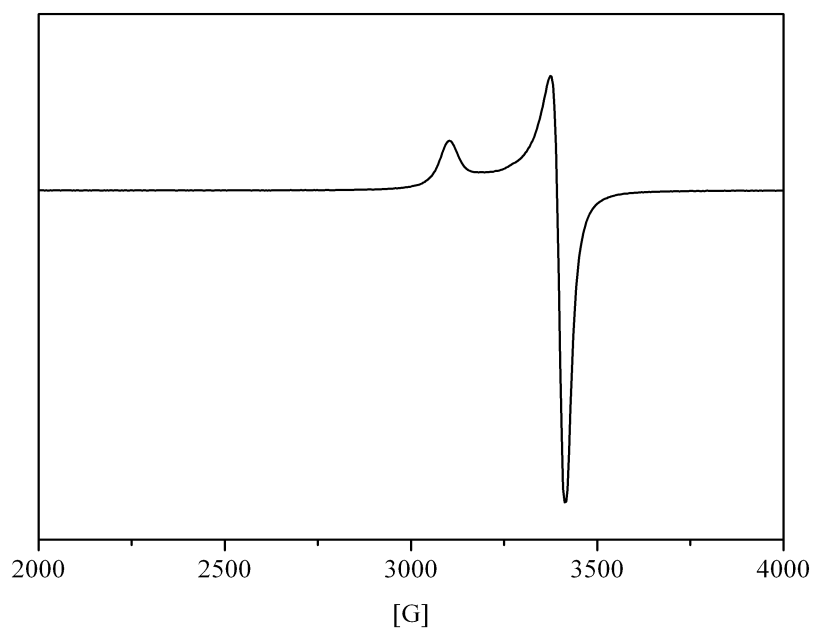

Figure S10. EPR spectrum of  $[\{\text{CuCl}(\text{DMPzTz})\}_2(\mu\text{-Cl})_2]$  in the polycrystalline state at 298 K.

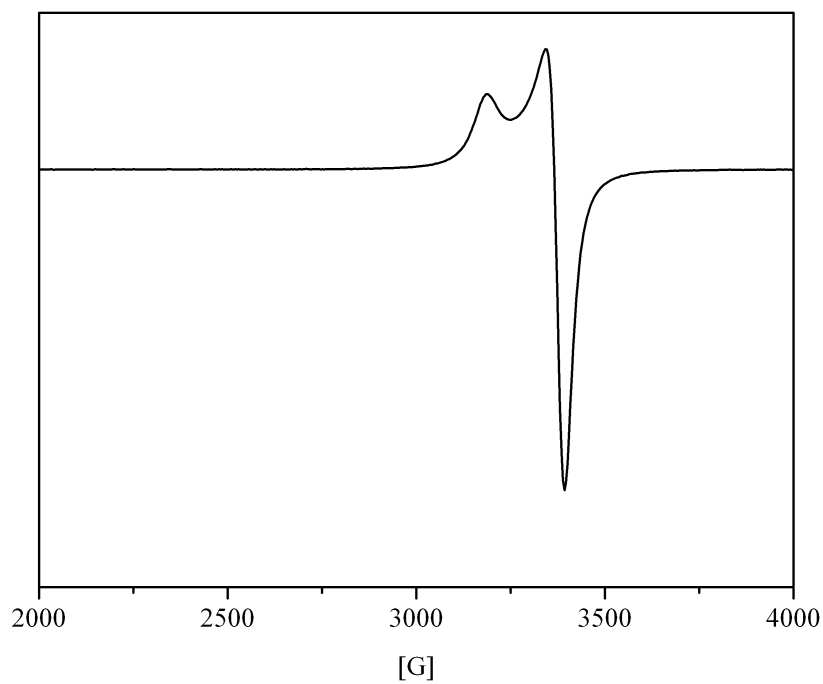

Figure S11. EPR spectrum of  $[\text{CuCl}_2(\text{DMPzTz})]$  in the polycrystalline state at 298 K.

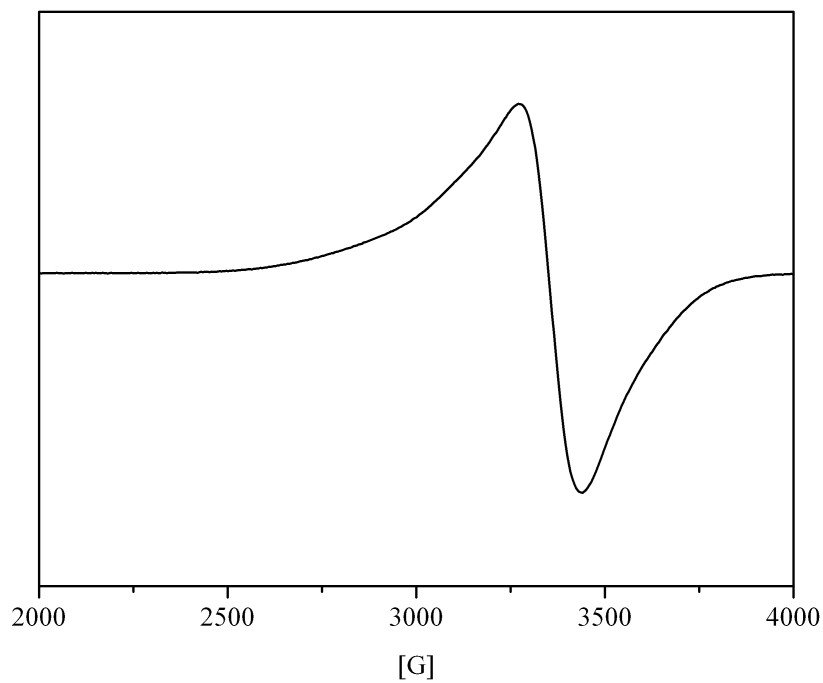

Figure S12. EPR spectrum of  $[\{\text{CuCl}(\text{DPhPzTz})\}_2(\mu\text{-Cl})_2]$  in the polycrystalline state at 298 K.

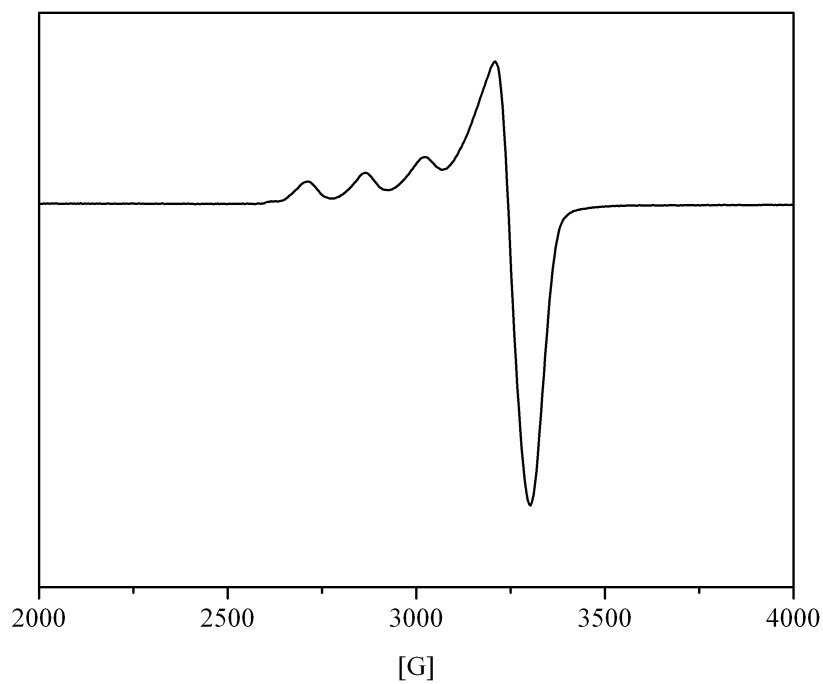

Figure S13. EPR spectrum of  $[\{\text{CuCl}(\text{PzTz})\}_2(\mu\text{-Cl})_2]$  in MeOH solution at 77 K.

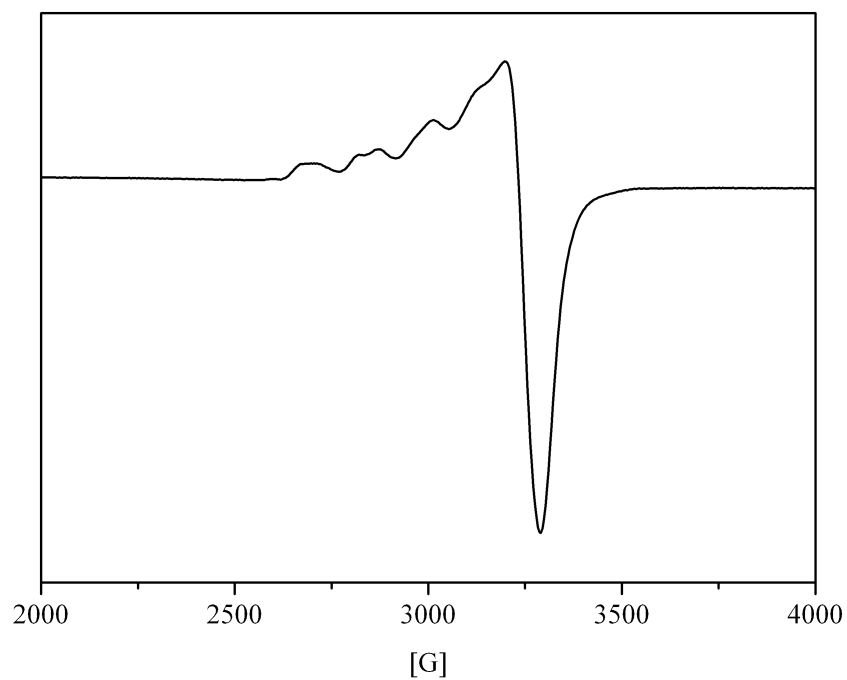

Figure S14. EPR spectrum of  $[\{\text{CuCl}(\text{DMPzTz})\}_2(\mu\text{-Cl})_2]$  in MeOH solution at 77 K.

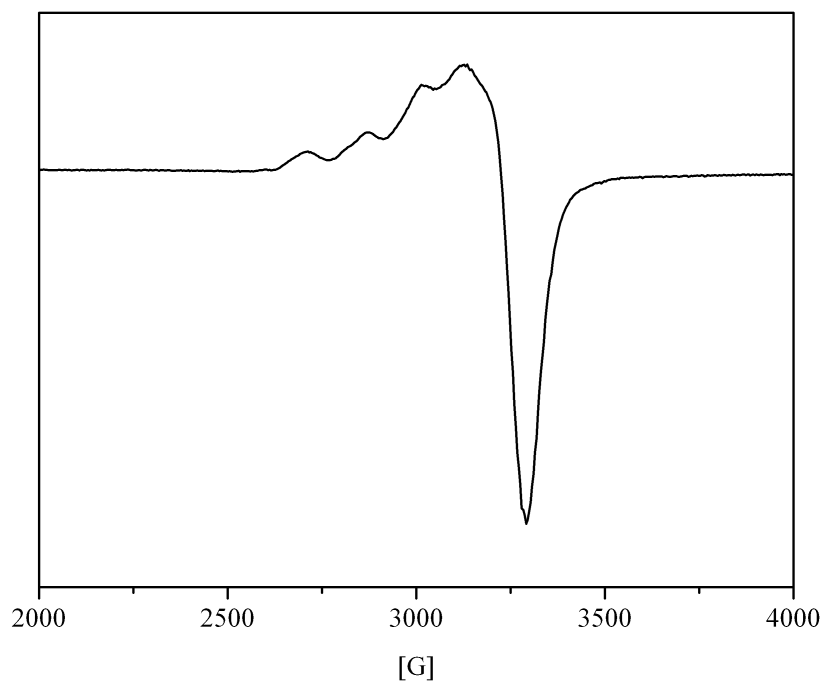

Figure S15. EPR spectrum of  $[\text{CuCl}_2(\text{DMPzTz})]$  in MeOH solution at 77 K.

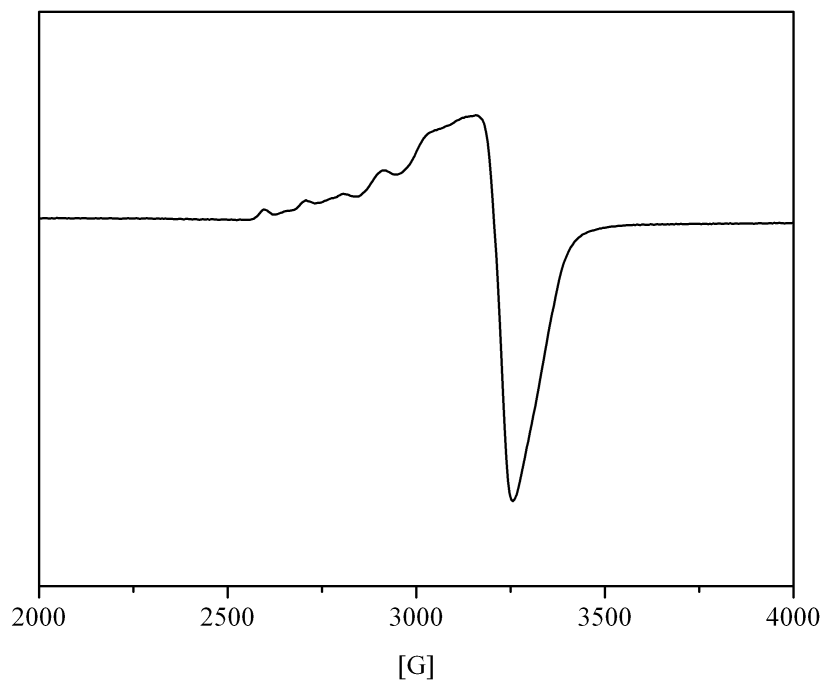

Figure S16. EPR spectrum of  $[\{\text{CuCl}(\text{DPhPzTz})\}_2(\mu\text{-Cl})_2]$  in MeOH solution at 77 K.

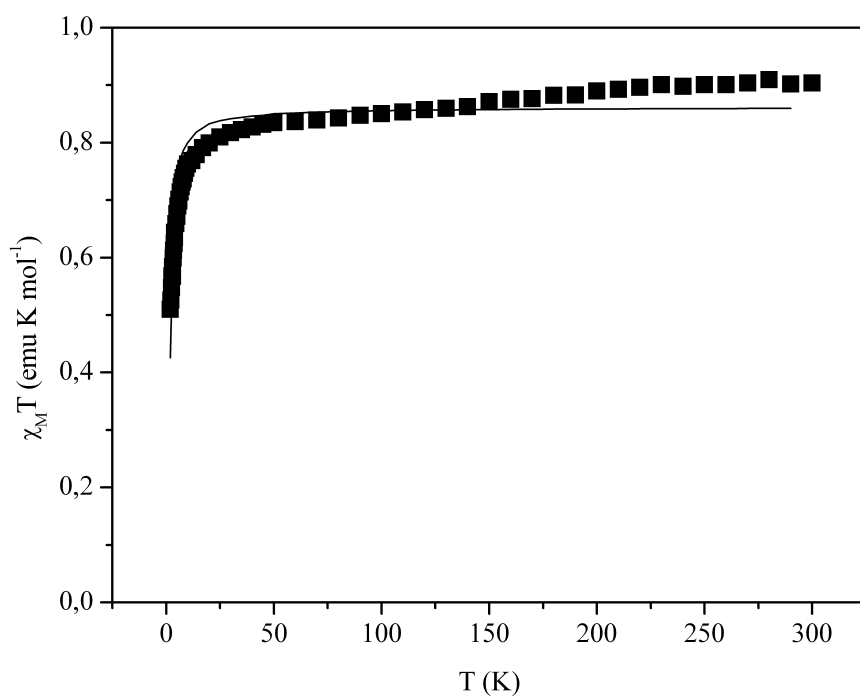

Figure S17. Experimental  $\chi_M T$  vs  $T$  data for  $[\{\text{CuCl}(\text{PzTz})\}_2(\mu\text{-Cl})_2]$ . Solid line represents the best fit of the data with the model described in the text.

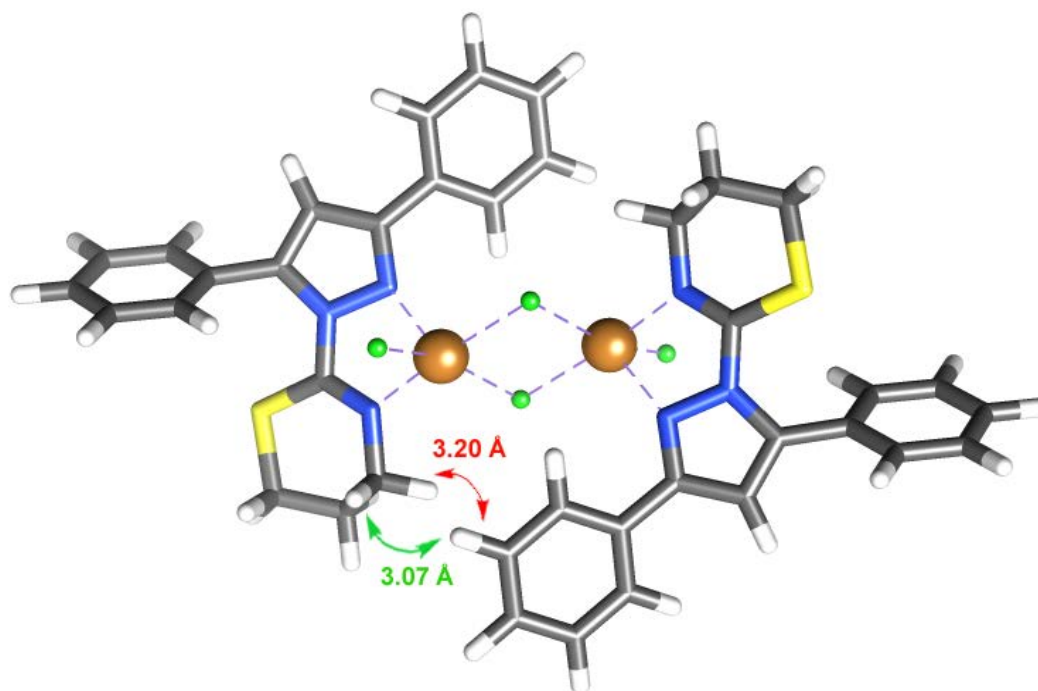

Figure S18. Structure of the *cis*- $[\{\text{CuCl}(\text{DPhPzTz})\}_2(\mu\text{-Cl})_2]$  complex optimized at the TPSSh/TZVP level highlighting the short  $\text{H}\cdots\text{H}$  distances involving the phenyl and thiazine moieties.

Table S3. Coupling constant and magnetostructural correlation parameters for selected bis( $\mu$ -chloro) copper(II) dimers<sup>a</sup>.

| Compound                                                                                           | $\varphi$ (deg) | $R$ (Å)        | $\varphi/R$ (deg Å <sup>-1</sup> ) | $J$ (cm <sup>-1</sup> ) | Reference |
|----------------------------------------------------------------------------------------------------|-----------------|----------------|------------------------------------|-------------------------|-----------|
| [CuCl <sub>2</sub> (2-pic) <sub>2</sub> ] <sub>2</sub>                                             | 100.6           | 3.36           | 29.9                               | -3.7                    | 2b        |
| [Cu(C <sub>9</sub> H <sub>10</sub> BrNO <sub>2</sub> )Cl] <sub>2</sub> ·H <sub>2</sub> O           | 84.66<br>84.25  | 2.685<br>2.669 | 31.51<br>(mean)                    | 43.2                    | 4c        |
| [{CuCl(DPhPzTz)} <sub>2</sub> ( $\mu$ -Cl) <sub>2</sub> ]                                          | 87.6            | 2.675          | 32.74                              | -1.01                   | This work |
| [CuCl <sub>2</sub> (C <sub>11</sub> H <sub>16</sub> N <sub>2</sub> O <sub>2</sub> ) <sub>2</sub> ] | 92.65           | 2.827          | 32.8                               | -0.47                   | 3a        |
| [CuCl(terpy)] <sub>2</sub> <sup>2+</sup>                                                           | 90.1            | 2.72           | 33.0                               | -3.0                    | 2e        |
| [Cu(iyda)Cl] <sub>2</sub> (ClO <sub>4</sub> ) <sub>2</sub>                                         | 88.81           | 2.657          | 33.42                              | 0.58                    | 2a        |
| [CuCl <sub>2</sub> (Mebta) <sub>2</sub> ] <sub>2</sub>                                             | 88.1            | 2.629          | 33.5                               | 3.4                     | 3f        |
| [Cu(pfsa)Cl] <sub>2</sub>                                                                          | 95.27           | 2.846          | 33.6                               | 0.15                    | 2p        |
| [Cu(pmda)Cl] <sub>2</sub> (ClO <sub>4</sub> ) <sub>2</sub>                                         | 88.2            | 2.581          | 34.17                              | 1.12                    | 2f        |
| [{CuCl(DMPzTz)} <sub>2</sub> ( $\mu$ -Cl) <sub>2</sub> ]                                           | 89.3            | 2.580          | 34.61                              | -0.32                   | This work |
| [CuCl <sub>2</sub> (Et <sub>3</sub> en)] <sub>2</sub>                                              | 94.8            | 2.728          | 34.75                              | 0.03                    | 2c        |
| [{CuCl(PzTz)} <sub>2</sub> ( $\mu$ -Cl) <sub>2</sub> ]                                             | 98.6            | 2.795          | 35.28                              | 0.48                    | This work |
| [Cu(dpt)Cl] <sub>2</sub> Cl <sub>2</sub>                                                           | 91.4            | 2.545          | 35.91                              | 42.94                   | 2l        |
| [CuCl(Mebta) <sub>3</sub> ] <sub>2</sub> <sup>2+</sup>                                             | 92.9            | 2.554          | 36.5                               | 5.2                     | 3f        |
| [CuCl(C <sub>13</sub> H <sub>11</sub> N <sub>2</sub> O)] <sub>2</sub>                              | 90.77           | 2.444          | 36.51                              | 0.7                     | 2j        |
| [CuCl <sub>3</sub> ](i-PrNH <sub>3</sub> ) <sub>2</sub>                                            | 95.5            | 2.315          | 41.34                              | 19.46                   | 4a        |

<sup>a</sup> Abbreviations: 2-pic, 2-methylpyridine; C<sub>9</sub>H<sub>9</sub>BrNO<sub>2</sub>, 2-(E)-(2-hydroxyethylimino)methyl)-4-bromophenolate anion; C<sub>11</sub>H<sub>16</sub>N<sub>2</sub>O<sub>2</sub>, 5-[(pyridin-2-ylmethylene)-amino]-pentan-1-ol; terpy, 2,2':6',2''-terpyridine; iyda, 1-(imidazol-4-ylmethyl)-1,5-diazacyclooctane; Mebta, 1-methylbenzotriazole; pfsa, 3-[N-2-(pyridylethyl)formimidoyl]salicylic acid; pmda, 1-(2-pyridylmethyl)-1,5-diazacyclooctane; Et<sub>3</sub>en, N,N,N-triethylenediamine; dpt, dipropylenetriamine; C<sub>13</sub>H<sub>11</sub>N<sub>2</sub>O, 2-methyl-6-[(pyridine-2-ylmethylene)amino]phenolate anion; i-Pr, isopropyl.

Table S4. Comparison of experimental (X-ray) and calculated (TPSSh/TZVP) bond distances ( $\text{\AA}$ ) of the metal coordination environments in  $[\text{CuCl}_2\text{L}]$  systems.

| $[\text{CuCl}_2\text{L}]$ | <b>PzTz</b>  | <b>DMPzTz</b> |              | <b>DPhPzTz</b> |
|---------------------------|--------------|---------------|--------------|----------------|
|                           | <b>Calc.</b> | <b>Exp.</b>   | <b>Calc.</b> | <b>Calc.</b>   |
| <b>Cu-N(1)</b>            | 1.997        | 1.9849(14)    | 2.003        | 2.005          |
| <b>Cu-N(3)</b>            | 2.066        | 1.9926(15)    | 2.021        | 2.035          |
| <b>Cu-Cl(1)</b>           | 2.272        | 2.2029(5)     | 2.266        | 2.262          |
| <b>Cu-Cl(2)</b>           | 2.250        | 2.2371(4)     | 2.260        | 2.251          |



Table S5. Comparison of experimental (X-ray) and calculated (TPSSh/TZVP) bond distances (Å) of the metal coordination environments in *cis*-[**CuClL**]<sub>2</sub>(μ-Cl<sub>2</sub>) systems.

|                  | <b>PzTz</b> |              | <b>DMPzTz</b> |              | <b>DPhPzTz</b> |
|------------------|-------------|--------------|---------------|--------------|----------------|
|                  | <b>Exp.</b> | <b>Calc.</b> | <b>Exp.</b>   | <b>Calc.</b> | <b>Calc.</b>   |
| <b>Cu-N(1)</b>   | 2.051(3)    | 2.067        | 1.998(4)      | 2.022        | 2.023          |
| <b>Cu-N(3)</b>   | 1.988(3)    | 2.016        | 2.028(2)      | 2.053        | 2.295          |
| <b>Cu-Cl(1)</b>  | 2.2920(8)   | 2.326        | 2.2727(7)     | 2.309        | 2.335          |
| <b>Cu-Cl(2)</b>  | 2.2275(8)   | 2.280        | 2.2637(8)     | 2.312        | 2.306          |
| <b>Cu-Cl(1a)</b> | 2.795(-)    | 2.679        | 2.5799(8)     | 2.672        | 2.385          |

Table S6. Comparison of experimental (X-ray) and calculated (TPSSh/TZVP) bond distances (Å) of the metal coordination environments in *trans*-[**CuClL**]<sub>2</sub>(μ-Cl<sub>2</sub>) systems.

|                  | <b>PzTz</b>  | <b>DMPzTz</b> | <b>DPhPzTz</b> |              |
|------------------|--------------|---------------|----------------|--------------|
|                  | <b>Calc.</b> | <b>Calc.</b>  | <b>Exp.</b>    | <b>Calc.</b> |
| <b>Cu-N(1)</b>   | 2.096        | 2.072         | 2.022(3)       | 2.059        |
| <b>Cu-N(3)</b>   | 2.002        | 2.011         | 2.026(3)       | 2.049        |
| <b>Cu-Cl(1)</b>  | 2.298        | 2.319         | 2.2817(12)     | 2.332        |
| <b>Cu-Cl(2)</b>  | 2.303        | 2.308         | 2.2444(12)     | 2.290        |
| <b>Cu-Cl(1a)</b> | 2.718        | 2.663         | 2.675 (2)      | 2.681        |

Table S7. Comparison of experimental and calculated exchange coupling constants [ $J$ ,  $\text{cm}^{-1}$ ] of the *cis* and *trans* isomers of [ $\{\text{CuCl}(\text{PzTz})\}_2(\mu\text{-Cl}_2)$ ].

|                      | <i>trans</i> -[ $\{\text{CuCl}(\text{PzTz})\}_2(\mu\text{-Cl}_2)$ ] | <i>cis</i> -[ $\{\text{CuCl}(\text{PzTz})\}_2(\mu\text{-Cl}_2)$ ] |
|----------------------|---------------------------------------------------------------------|-------------------------------------------------------------------|
| <b>BLYP</b>          | 16.97                                                               | 7.97                                                              |
| <b>TPSS</b>          | 14.55                                                               | 6.99                                                              |
| <b>TPSSh</b>         | 9.49                                                                | 4.21                                                              |
| <b>B3LYP</b>         | 8.09                                                                | 3.25                                                              |
| <b>TPSS0</b>         | 5.13                                                                | 1.83                                                              |
| <b>BHLYP</b>         | 2.55                                                                | 0.76                                                              |
| <b>CASSCF</b>        | 0.50                                                                | 0.30                                                              |
| <b>CASSCF/NEVPT2</b> | 0.20                                                                | -0.1                                                              |
| <b>Experimental</b>  | 1.09 <sup>[a]</sup>                                                 | -1.0 (-0.32) <sup>[b]</sup>                                       |

<sup>[a]</sup> Value determined for *trans*-[ $\text{CuCl}(\text{DPhPzTz})](\mu\text{-Cl}_2)$ . <sup>[b]</sup> Value determined for *cis*-[ $\text{CuCl}(\text{DMPzTz})](\mu\text{-Cl}_2)$ .

Table S8. Optimized Cartesian coordinates ( $\text{\AA}$ ) calculated for [ $\text{CuCl}_2(\text{PzTz})$ ] (TPSSh/TZVP; PCM = methanol; 0 Imaginary frequencies).

| Center Number | Atomic Number | Coordinates (Angstroms) |           |           |
|---------------|---------------|-------------------------|-----------|-----------|
|               |               | X                       | Y         | Z         |
| 1             | 6             | -1.441823               | 0.340696  | -0.050430 |
| 2             | 6             | -1.308775               | -2.056895 | 0.115529  |
| 3             | 1             | -0.605457               | -2.661704 | 0.684310  |
| 4             | 1             | -1.346370               | -2.477157 | -0.893345 |
| 5             | 6             | -2.685648               | -2.074487 | 0.764444  |
| 6             | 1             | -3.037539               | -3.109094 | 0.785277  |
| 7             | 1             | -2.621630               | -1.724805 | 1.797640  |
| 8             | 6             | -3.694131               | -1.244607 | -0.009283 |
| 9             | 1             | -4.667494               | -1.218976 | 0.478499  |
| 10            | 1             | -3.813511               | -1.592336 | -1.034280 |
| 11            | 6             | 1.058729                | 2.742198  | -0.086173 |
| 12            | 6             | -0.021898               | 3.639905  | -0.186566 |
| 13            | 1             | 0.022432                | 4.714246  | -0.245972 |
| 14            | 6             | -1.152035               | 2.858981  | -0.193446 |
| 15            | 17            | 3.418996                | 0.296047  | 0.540832  |
| 16            | 17            | 1.883688                | -2.476395 | -0.600706 |
| 17            | 29            | 1.320998                | -0.378480 | -0.011739 |
| 18            | 7             | -0.717517               | -0.714819 | 0.016790  |
| 19            | 7             | -0.736940               | 1.561649  | -0.100979 |
| 20            | 7             | 0.620059                | 1.491462  | -0.033592 |
| 21            | 16            | -3.187039               | 0.528862  | -0.075828 |
| 22            | 1             | -2.197106               | 3.113811  | -0.255800 |
| 23            | 1             | 2.119004                | 2.933251  | -0.044760 |

E(UTPSSh) = -3395.8969876 Hartree

Zero-point correction = 0.162792

Thermal correction to Energy = 0.177715

Thermal correction to Enthalpy = 0.178659

Thermal correction to Gibbs Free Energy = 0.117503  
 Sum of electronic and zero-point Energies = -3395.734195  
 Sum of electronic and thermal Energies = -3395.719273  
 Sum of electronic and thermal Enthalpies = -3395.718329  
 Sum of electronic and thermal Free Energies = -3395.779485

Table S9. Optimized Cartesian coordinates (Å) calculated for [CuCl<sub>2</sub>(DMPzTz)]  
 (TPSSH/TZVP; PCM = methanol; 0 Imaginary frequencies).

| Center<br>Number | Atomic<br>Number | Coordinates (Angstroms) |           |           |
|------------------|------------------|-------------------------|-----------|-----------|
|                  |                  | X                       | Y         | Z         |
| 1                | 6                | -1.422756               | -0.093472 | -0.003152 |
| 2                | 6                | -0.944501               | -2.472022 | 0.052538  |
| 3                | 1                | -0.124207               | -2.982751 | 0.553910  |
| 4                | 1                | -0.982528               | -2.858373 | -0.969657 |
| 5                | 6                | -2.256851               | -2.726646 | 0.777251  |
| 6                | 1                | -2.450631               | -3.802192 | 0.764002  |
| 7                | 1                | -2.182837               | -2.413899 | 1.821485  |
| 8                | 6                | -3.411289               | -2.019496 | 0.095152  |
| 9                | 1                | -4.352896               | -2.155884 | 0.625729  |
| 10               | 1                | -3.533358               | -2.337486 | -0.939303 |
| 11               | 6                | 0.807822                | 2.570011  | -0.183153 |
| 12               | 6                | -0.372985               | 3.340366  | -0.236048 |
| 13               | 1                | -0.439217               | 4.412466  | -0.327107 |
| 14               | 6                | -1.435784               | 2.475483  | -0.154306 |
| 15               | 6                | 2.216115                | 3.046385  | -0.267475 |
| 16               | 1                | 2.405392                | 3.795921  | 0.504570  |
| 17               | 1                | 2.385949                | 3.521217  | -1.237436 |
| 18               | 1                | 2.912199                | 2.219836  | -0.139001 |
| 19               | 6                | -2.885221               | 2.819787  | -0.174976 |
| 20               | 1                | -2.967852               | 3.902125  | -0.269542 |
| 21               | 1                | -3.389677               | 2.515191  | 0.744222  |
| 22               | 1                | -3.401967               | 2.358874  | -1.019298 |
| 23               | 17               | 3.225992                | -0.053240 | 1.200441  |
| 24               | 17               | 2.180844                | -2.299354 | -1.157239 |
| 25               | 29               | 1.379384                | -0.511463 | -0.030517 |
| 26               | 7                | -0.568077               | -1.053117 | -0.021551 |
| 27               | 7                | -0.884175               | 1.209189  | -0.049044 |
| 28               | 7                | 0.492331                | 1.283582  | -0.065684 |
| 29               | 16               | -3.177787               | -0.191779 | 0.097309  |

E(UTPSSH) = -3474.5648064 Hartree  
 Zero-point correction = 0.217664  
 Thermal correction to Energy = 0.236064  
 Thermal correction to Enthalpy = 0.237008  
 Thermal correction to Gibbs Free Energy = 0.168303  
 Sum of electronic and zero-point Energies = -3474.347142  
 Sum of electronic and thermal Energies = -3474.328742  
 Sum of electronic and thermal Enthalpies = -3474.327798  
 Sum of electronic and thermal Free Energies = -3474.396504

Table S10. Optimized Cartesian coordinates (Å) calculated for [CuCl<sub>2</sub>(DPhPzTz)] (TPSSH/TZVP; PCM = methanol; 0 Imaginary frequencies).

| Center Number | Atomic Number | Coordinates (Angstroms) |           |           |
|---------------|---------------|-------------------------|-----------|-----------|
|               |               | X                       | Y         | Z         |
| 1             | 6             | -1.289126               | 1.093922  | 0.206427  |
| 2             | 6             | -0.772873               | 3.464463  | 0.244899  |
| 3             | 1             | -0.104245               | 4.004780  | -0.423204 |
| 4             | 1             | -0.515138               | 3.768067  | 1.263450  |
| 5             | 6             | -2.225024               | 3.789670  | -0.065683 |
| 6             | 1             | -2.378302               | 4.857578  | 0.110005  |
| 7             | 1             | -2.445785               | 3.590971  | -1.117134 |
| 8             | 6             | -3.170373               | 3.008628  | 0.827091  |
| 9             | 1             | -4.216424               | 3.212239  | 0.601319  |
| 10            | 1             | -2.987619               | 3.199939  | 1.883886  |
| 11            | 6             | 0.901042                | -1.609287 | 0.175997  |
| 12            | 6             | -0.290199               | -2.366418 | 0.121639  |
| 13            | 1             | -0.381779               | -3.439721 | 0.135108  |
| 14            | 6             | -1.333236               | -1.473907 | 0.047557  |
| 15            | 17            | 2.917515                | 0.801101  | -1.874295 |
| 16            | 17            | 2.558308                | 3.298981  | 0.461710  |
| 17            | 29            | 1.485051                | 1.452198  | -0.249132 |
| 18            | 7             | -0.428411               | 2.042570  | 0.111001  |
| 19            | 7             | -0.762237               | -0.214884 | 0.067142  |
| 20            | 7             | 0.603795                | -0.308184 | 0.128885  |
| 21            | 16            | -3.013332               | 1.192775  | 0.544725  |
| 22            | 6             | 2.272907                | -2.100754 | 0.317990  |
| 23            | 6             | 3.227775                | -1.368323 | 1.036032  |
| 24            | 6             | 2.630802                | -3.336767 | -0.237192 |
| 25            | 6             | 4.520536                | -1.857673 | 1.180392  |
| 26            | 1             | 2.951174                | -0.425965 | 1.494427  |
| 27            | 6             | 3.926322                | -3.820791 | -0.092081 |
| 28            | 1             | 1.901273                | -3.908492 | -0.799440 |
| 29            | 6             | 4.873972                | -3.082621 | 0.615420  |
| 30            | 1             | 5.251408                | -1.286257 | 1.741035  |
| 31            | 1             | 4.196670                | -4.773087 | -0.533643 |
| 32            | 1             | 5.882844                | -3.462448 | 0.730340  |
| 33            | 6             | -2.768052               | -1.777231 | -0.095953 |
| 34            | 6             | -3.434576               | -2.467276 | 0.923107  |
| 35            | 6             | -3.441469               | -1.476178 | -1.287362 |
| 36            | 6             | -4.768593               | -2.828604 | 0.761380  |
| 37            | 1             | -2.910088               | -2.707729 | 1.840542  |
| 38            | 6             | -4.772573               | -1.845272 | -1.444160 |
| 39            | 1             | -2.920543               | -0.963420 | -2.087796 |
| 40            | 6             | -5.438920               | -2.517347 | -0.420057 |
| 41            | 1             | -5.282470               | -3.355585 | 1.557026  |
| 42            | 1             | -5.287978               | -1.613712 | -2.369118 |
| 43            | 1             | -6.477247               | -2.802602 | -0.545496 |

E(UTPSSH) = -3858.1794111 Hartree

Zero-point correction = 0.322660

Thermal correction to Energy = 0.347494

Thermal correction to Enthalpy = 0.348439

Thermal correction to Gibbs Free Energy = 0.263171

Sum of electronic and zero-point Energies = -3857.856751

Sum of electronic and thermal Energies = -3857.831917

Sum of electronic and thermal Enthalpies = -3857.830972

Sum of electronic and thermal Free Energies = -3857.916240

Table S11. Optimized Cartesian coordinates (Å) calculated for *cis*-[CuCl(PzTz)<sub>2</sub>(μ-Cl<sub>2</sub>)] (TPSSH/TZVP; PCM = methanol; 0 Imaginary frequencies).

| Center Number | Atomic Number | Coordinates (Angstroms) |           |           |
|---------------|---------------|-------------------------|-----------|-----------|
|               |               | X                       | Y         | Z         |
| 1             | 6             | 4.146032                | -0.294992 | -0.071396 |
| 2             | 6             | 3.802876                | 2.090691  | -0.068079 |
| 3             | 1             | 2.905833                | 2.630226  | 0.231143  |
| 4             | 1             | 4.122851                | 2.511796  | -1.024853 |
| 5             | 6             | 4.891917                | 2.232907  | 0.985966  |
| 6             | 1             | 4.519021                | 1.910432  | 1.961039  |
| 7             | 1             | 5.152091                | 3.291764  | 1.063329  |
| 8             | 6             | 6.146436                | 1.457298  | 0.624191  |
| 9             | 1             | 6.913260                | 1.533732  | 1.393811  |
| 10            | 1             | 6.563597                | 1.770117  | -0.331945 |
| 11            | 6             | 1.961169                | -2.882312 | -0.810127 |
| 12            | 1             | 0.963140                | -3.156223 | -1.111558 |
| 13            | 6             | 3.070979                | -3.695064 | -0.504619 |
| 14            | 1             | 3.120141                | -4.770748 | -0.521607 |
| 15            | 6             | 4.085520                | -2.827789 | -0.181164 |
| 16            | 1             | 5.108375                | -2.999091 | 0.110982  |
| 17            | 17            | -0.584672               | -0.664456 | -1.547956 |
| 18            | 17            | 1.146561                | 2.211926  | -2.026488 |
| 19            | 29            | 1.474233                | 0.233072  | -0.942071 |
| 20            | 7             | 3.385173                | 0.704969  | -0.312877 |
| 21            | 7             | 3.577148                | -1.565569 | -0.295545 |
| 22            | 7             | 2.272343                | -1.600044 | -0.681447 |
| 23            | 16            | 5.799991                | -0.351628 | 0.523452  |
| 24            | 6             | -4.146036               | 0.295006  | 0.071397  |
| 25            | 6             | -3.802906               | -2.090681 | 0.068102  |
| 26            | 1             | -2.905877               | -2.630222 | -0.231149 |
| 27            | 1             | -4.122848               | -2.511781 | 1.024890  |
| 28            | 6             | -4.891986               | -2.232900 | -0.985904 |
| 29            | 1             | -4.519120               | -1.910447 | -1.960996 |
| 30            | 1             | -5.152176               | -3.291755 | -1.063240 |
| 31            | 6             | -6.146483               | -1.457269 | -0.624099 |
| 32            | 1             | -6.913335               | -1.533709 | -1.393689 |
| 33            | 1             | -6.563612               | -1.770066 | 0.332058  |
| 34            | 6             | -1.961146               | 2.882300  | 0.810131  |
| 35            | 1             | -0.963111               | 3.156200  | 1.111553  |
| 36            | 6             | -3.070877               | 3.695072  | 0.504392  |
| 37            | 1             | -3.119971               | 4.770761  | 0.521191  |
| 38            | 6             | -4.085519               | 2.827800  | 0.181244  |
| 39            | 1             | -5.108390               | 2.999114  | -0.110838 |
| 40            | 17            | 0.584685                | 0.664409  | 1.547943  |
| 41            | 17            | -1.146551               | -2.211941 | 2.026452  |
| 42            | 29            | -1.474227               | -0.233070 | 0.942064  |
| 43            | 7             | -3.385187               | -0.704962 | 0.312872  |
| 44            | 7             | -3.577139               | 1.565577  | 0.295547  |
| 45            | 7             | -2.272329               | 1.600036  | 0.681432  |
| 46            | 16            | -5.800015               | 0.351655  | -0.523403 |

E(UTPSSH) = -6791.803126 Hartree  
Zero-point correction = 0.326371  
Thermal correction to Energy = 0.358208  
Thermal correction to Enthalpy = 0.359152  
Thermal correction to Gibbs Free Energy = 0.257253  
Sum of electronic and zero-point Energies = -6791.476755  
Sum of electronic and thermal Energies = -6791.444918  
Sum of electronic and thermal Enthalpies = -6791.443974  
Sum of electronic and thermal Free Energies = -6791.545873

Table S12. Optimized Cartesian coordinates (Å) calculated for *trans*-[**CuCl(PzTz)**]<sub>2</sub>( $\mu$ -Cl<sub>2</sub>) (TPSSh/TZVP; PCM = methanol; 0 Imaginary frequencies).

| Center Number | Atomic Number | Coordinates (Angstroms) |           |           |
|---------------|---------------|-------------------------|-----------|-----------|
|               |               | X                       | Y         | Z         |
| 1             | 6             | 2.368926                | 0.030016  | 3.130844  |
| 2             | 6             | 2.093173                | -1.939438 | 1.776852  |
| 3             | 1             | 3.029722                | -2.160692 | 1.255713  |
| 4             | 1             | 1.278078                | -2.162827 | 1.091172  |
| 5             | 6             | 1.960213                | -2.776315 | 3.040484  |
| 6             | 1             | 2.041035                | -3.829024 | 2.757017  |
| 7             | 1             | 0.973421                | -2.629342 | 3.485554  |
| 8             | 6             | 3.043965                | -2.470238 | 4.058119  |
| 9             | 1             | 4.043689                | -2.633667 | 3.658193  |
| 10            | 1             | 2.924170                | -3.045589 | 4.974985  |
| 11            | 6             | 1.800996                | 3.376204  | 2.419402  |
| 12            | 6             | 2.195408                | 3.564518  | 3.758513  |
| 13            | 1             | 2.267397                | 4.495036  | 4.295806  |
| 14            | 6             | 2.476973                | 2.309242  | 4.240486  |
| 15            | 17            | -1.194611               | 0.663309  | 1.129361  |
| 16            | 17            | 1.562976                | 2.676129  | -0.904607 |
| 17            | 29            | 1.450188                | 0.889952  | 0.545228  |
| 18            | 7             | 2.051163                | -0.488195 | 2.004881  |
| 19            | 7             | 2.247621                | 1.433279  | 3.218580  |
| 20            | 7             | 1.834302                | 2.089300  | 2.102133  |
| 21            | 16            | 2.944053                | -0.716333 | 4.617039  |
| 22            | 6             | -2.368926               | -0.030016 | -3.130844 |
| 23            | 6             | -2.093173               | 1.939438  | -1.776852 |
| 24            | 1             | -3.029722               | 2.160692  | -1.255713 |
| 25            | 1             | -1.278078               | 2.162827  | -1.091172 |
| 26            | 6             | -1.960213               | 2.776315  | -3.040484 |
| 27            | 1             | -2.041035               | 3.829024  | -2.757017 |
| 28            | 1             | -0.973421               | 2.629342  | -3.485554 |
| 29            | 6             | -3.043965               | 2.470238  | -4.058119 |
| 30            | 1             | -4.043689               | 2.633667  | -3.658193 |
| 31            | 1             | -2.924170               | 3.045589  | -4.974985 |
| 32            | 6             | -1.800996               | -3.376204 | -2.419402 |
| 33            | 6             | -2.195408               | -3.564518 | -3.758513 |
| 34            | 1             | -2.267397               | -4.495036 | -4.295806 |
| 35            | 6             | -2.476973               | -2.309242 | -4.240486 |
| 36            | 17            | 1.194611                | -0.663309 | -1.129361 |
| 37            | 17            | -1.562976               | -2.676129 | 0.904607  |
| 38            | 29            | -1.450188               | -0.889952 | -0.545228 |
| 39            | 7             | -2.051163               | 0.488195  | -2.004881 |
| 40            | 7             | -2.247621               | -1.433279 | -3.218580 |
| 41            | 7             | -1.834302               | -2.089300 | -2.102133 |
| 42            | 16            | -2.944053               | 0.716333  | -4.617039 |
| 43            | 1             | 1.506973                | 4.096664  | 1.673424  |
| 44            | 1             | 2.816879                | 1.972425  | 5.205863  |
| 45            | 1             | -2.816879               | -1.972425 | -5.205863 |
| 46            | 1             | -1.506973               | -4.096664 | -1.673424 |

E(UTPSSh) = -6791.801687 Hartree

Zero-point correction = 0.326341

Thermal correction to Energy = 0.358204

Thermal correction to Enthalpy = 0.359148

Thermal correction to Gibbs Free Energy = 0.257115

Sum of electronic and zero-point Energies = -6791.475346

Sum of electronic and thermal Energies = -6791.443483

Sum of electronic and thermal Enthalpies = -6791.442539

Sum of electronic and thermal Free Energies = -6791.544572

Table S13. Optimized Cartesian coordinates (Å) calculated for *cis*-[CuCl(DMPzTz)<sub>2</sub>(μ-Cl<sub>2</sub>)] (TPSSh/TZVP; PCM = methanol; 0 Imaginary frequencies).

| Center Number | Atomic Number | Coordinates (Angstroms) |           |           |
|---------------|---------------|-------------------------|-----------|-----------|
|               |               | X                       | Y         | Z         |
| 1             | 17            | -0.472824               | 0.975665  | 1.326368  |
| 2             | 17            | 1.117314                | -1.677066 | 2.633809  |
| 3             | 6             | 6.207828                | 2.236870  | -0.510100 |
| 4             | 1             | 6.832940                | 1.704640  | 0.209440  |
| 5             | 1             | 6.529400                | 3.277594  | -0.543077 |
| 6             | 1             | 6.369780                | 1.797455  | -1.496537 |
| 7             | 6             | 1.492592                | 3.645208  | 0.811373  |
| 8             | 1             | 1.127482                | 3.410312  | 1.811859  |
| 9             | 1             | 0.676386                | 3.454121  | 0.113624  |
| 10            | 1             | 1.761053                | 4.700603  | 0.766994  |
| 11            | 29            | 1.529081                | -0.119575 | 0.975127  |
| 12            | 16            | 5.791956                | -0.754054 | -0.581903 |
| 13            | 7             | 3.240202                | -1.031008 | 0.402192  |
| 14            | 7             | 3.971678                | 1.111873  | 0.095662  |
| 15            | 6             | 4.207966                | -0.276782 | 0.031081  |
| 16            | 7             | 2.693675                | 1.489839  | 0.459153  |
| 17            | 6             | 3.282482                | -2.497531 | 0.336085  |
| 18            | 1             | 2.261025                | -2.818686 | 0.139545  |
| 19            | 1             | 3.550240                | -2.865259 | 1.329628  |
| 20            | 6             | 4.228252                | -3.044660 | -0.721018 |
| 21            | 1             | 4.198427                | -4.136290 | -0.672066 |
| 22            | 1             | 3.899705                | -2.746096 | -1.719418 |
| 23            | 6             | 3.962018                | 3.306753  | 0.113303  |
| 24            | 1             | 4.257550                | 4.340719  | 0.037635  |
| 25            | 6             | 5.652452                | -2.587246 | -0.475658 |
| 26            | 1             | 6.341241                | -2.939308 | -1.242830 |
| 27            | 1             | 6.018517                | -2.894613 | 0.503169  |
| 28            | 6             | 4.769200                | 2.221060  | -0.119495 |
| 29            | 6             | 2.688176                | 2.821995  | 0.470201  |
| 30            | 17            | 0.472738                | -0.977148 | -1.325078 |
| 31            | 17            | -1.115498               | 1.676812  | -2.632412 |
| 32            | 6             | -6.209534               | -2.235678 | 0.507189  |
| 33            | 1             | -6.833881               | -1.702752 | -0.212491 |
| 34            | 1             | -6.531650               | -3.276259 | 0.539405  |
| 35            | 1             | -6.371948               | -1.796703 | 1.493747  |
| 36            | 6             | -1.493892               | -3.645768 | -0.810953 |
| 37            | 1             | -1.128530               | -3.411678 | -1.811549 |
| 38            | 1             | -0.677824               | -3.454250 | -0.113174 |
| 39            | 1             | -1.762522               | -4.701090 | -0.765893 |
| 40            | 29            | -1.528726               | 0.119044  | -0.974254 |
| 41            | 16            | -5.792060               | 0.755110  | 0.580803  |
| 42            | 7             | -3.239714               | 1.031109  | -0.402006 |
| 43            | 7             | -3.972402               | -1.111510 | -0.096554 |
| 44            | 6             | -4.208045               | 0.277243  | -0.031646 |
| 45            | 7             | -2.694305               | -1.489975 | -0.459209 |
| 46            | 6             | -3.281307               | 2.497633  | -0.335517 |
| 47            | 1             | -2.259784               | 2.818236  | -0.138400 |
| 48            | 1             | -3.548402               | 2.865746  | -1.329097 |
| 49            | 6             | -4.227307               | 3.044945  | 0.721284  |
| 50            | 1             | -4.196953               | 4.136573  | 0.672602  |
| 51            | 1             | -3.899340               | 2.746001  | 1.719761  |
| 52            | 6             | -3.963772               | -3.306394 | -0.114901 |
| 53            | 1             | -4.259841               | -4.340246 | -0.039762 |
| 54            | 6             | -5.651616               | 2.588275  | 0.475195  |
| 55            | 1             | -6.340543               | 2.940427  | 1.242201  |
| 56            | 1             | -6.017151               | 2.896121  | -0.503680 |
| 57            | 6             | -4.770622               | -2.220392 | 0.117611  |
| 58            | 6             | -2.689428               | -2.822127 | -0.470653 |

E(UTPSSh) = -6949.13326369 Hartree

Zero-point correction = 0.436403  
 Thermal correction to Energy = 0.475096  
 Thermal correction to Enthalpy = 0.476040  
 Thermal correction to Gibbs Free Energy = 0.358218  
 Sum of electronic and zero-point Energies = -6948.696861  
 Sum of electronic and thermal Energies = -6948.658168  
 Sum of electronic and thermal Enthalpies = -6948.657223  
 Sum of electronic and thermal Free Energies = -6948.775046

Table S14. Optimized Cartesian coordinates (Å) calculated for *trans*-  
 [{CuCl(DMPzTz)}<sub>2</sub>(μ-Cl<sub>2</sub>)] (TPSSh/TZVP; PCM = methanol; 0 Imaginary frequencies).

| Center<br>Number | Atomic<br>Number | Coordinates (Angstroms) |           |           |
|------------------|------------------|-------------------------|-----------|-----------|
|                  |                  | X                       | Y         | Z         |
| 1                | 6                | 2.602680                | 0.011731  | 3.123010  |
| 2                | 6                | 2.099062                | -1.972896 | 1.833387  |
| 3                | 1                | 2.937093                | -2.228145 | 1.178159  |
| 4                | 1                | 1.186597                | -2.169769 | 1.273577  |
| 5                | 6                | 2.131710                | -2.808583 | 3.102607  |
| 6                | 1                | 2.137683                | -3.862872 | 2.813676  |
| 7                | 1                | 1.232458                | -2.632276 | 3.697832  |
| 8                | 6                | 3.370666                | -2.521824 | 3.927859  |
| 9                | 1                | 4.288116                | -2.703460 | 3.369199  |
| 10               | 1                | 3.396220                | -3.093479 | 4.854831  |
| 11               | 6                | 1.626187                | 3.294117  | 2.535006  |
| 12               | 6                | 2.229670                | 3.525720  | 3.789143  |
| 13               | 1                | 2.267320                | 4.461412  | 4.323318  |
| 14               | 6                | 2.759433                | 2.334621  | 4.220024  |
| 15               | 6                | 0.895101                | 4.272421  | 1.682264  |
| 16               | 6                | 3.500310                | 2.084021  | 5.489063  |
| 17               | 17               | -1.149187               | 0.785424  | 1.028166  |
| 18               | 17               | 2.001486                | 2.430628  | -0.953693 |
| 19               | 29               | 1.481055                | 0.817725  | 0.613610  |
| 20               | 7                | 2.132763                | -0.520852 | 2.054723  |
| 21               | 7                | 2.471992                | 1.414551  | 3.225470  |
| 22               | 7                | 1.781355                | 2.018337  | 2.199121  |
| 23               | 16               | 3.386171                | -0.771893 | 4.496819  |
| 24               | 6                | -2.602680               | -0.011731 | -3.123010 |
| 25               | 6                | -2.099062               | 1.972896  | -1.833387 |
| 26               | 1                | -2.937093               | 2.228145  | -1.178159 |
| 27               | 1                | -1.186597               | 2.169769  | -1.273577 |
| 28               | 6                | -2.131710               | 2.808583  | -3.102607 |
| 29               | 1                | -2.137683               | 3.862872  | -2.813676 |
| 30               | 1                | -1.232458               | 2.632276  | -3.697832 |
| 31               | 6                | -3.370666               | 2.521824  | -3.927859 |
| 32               | 1                | -4.288116               | 2.703460  | -3.369199 |
| 33               | 1                | -3.396220               | 3.093479  | -4.854831 |
| 34               | 6                | -1.626187               | -3.294117 | -2.535006 |
| 35               | 6                | -2.229670               | -3.525720 | -3.789143 |
| 36               | 1                | -2.267320               | -4.461412 | -4.323318 |
| 37               | 6                | -2.759433               | -2.334621 | -4.220024 |
| 38               | 6                | -0.895101               | -4.272421 | -1.682264 |
| 39               | 6                | -3.500310               | -2.084021 | -5.489063 |
| 40               | 17               | 1.149187                | -0.785424 | -1.028166 |
| 41               | 17               | -2.001486               | -2.430628 | 0.953693  |
| 42               | 29               | -1.481055               | -0.817725 | -0.613610 |
| 43               | 7                | -2.132763               | 0.520852  | -2.054723 |
| 44               | 7                | -2.471992               | -1.414551 | -3.225470 |
| 45               | 7                | -1.781355               | -2.018337 | -2.199121 |
| 46               | 16               | -3.386171               | 0.771893  | -4.496819 |
| 47               | 1                | 1.598741                | 4.864252  | 1.092042  |
| 48               | 1                | 0.223972                | 3.760570  | 0.995726  |



|    |   |           |           |           |
|----|---|-----------|-----------|-----------|
| 49 | 1 | 0.326035  | 4.953582  | 2.317735  |
| 50 | 1 | 3.615063  | 3.039992  | 5.999524  |
| 51 | 1 | 2.960353  | 1.404947  | 6.152266  |
| 52 | 1 | 4.493038  | 1.668247  | 5.306615  |
| 53 | 1 | -2.960353 | -1.404947 | -6.152266 |
| 54 | 1 | -3.615063 | -3.039992 | -5.999524 |
| 55 | 1 | -4.493038 | -1.668247 | -5.306615 |
| 56 | 1 | -0.223972 | -3.760570 | -0.995726 |
| 57 | 1 | -1.598741 | -4.864252 | -1.092042 |
| 58 | 1 | -0.326035 | -4.953582 | -2.317735 |

-----  
E(UTPSSh) = -6949.13329011 Hartree

Zero-point correction = 0.436309

Thermal correction to Energy = 0.475038

Thermal correction to Enthalpy = 0.475983

Thermal correction to Gibbs Free Energy = 0.358361

Sum of electronic and zero-point Energies = -6948.696982

Sum of electronic and thermal Energies = -6948.658252

Sum of electronic and thermal Enthalpies = -6948.657307

Sum of electronic and thermal Free Energies = -6948.774929

Table S15. Optimized Cartesian coordinates (Å) calculated for *cis*-[ $\{\text{CuCl}(\text{DPhPzTz})\}_2(\mu\text{-Cl}_2)$ ] (TPSSh/TZVP; PCM = methanol; 0 Imaginary frequencies).

| Center<br>Number | Atomic<br>Number | Coordinates (Angstroms) |           |           |
|------------------|------------------|-------------------------|-----------|-----------|
|                  |                  | X                       | Y         | Z         |
| 1                | 17               | 0.165575                | -0.858487 | 1.331886  |
| 2                | 17               | -2.511579               | 0.672399  | 2.617473  |
| 3                | 29               | -1.613978               | 0.409461  | 0.509371  |
| 4                | 16               | -5.567898               | 1.819362  | -1.327517 |
| 5                | 7                | -3.037563               | 1.617850  | -0.268988 |
| 6                | 7                | -4.282729               | -0.306308 | -0.331867 |
| 7                | 6                | -4.165276               | 1.084564  | -0.558725 |
| 8                | 7                | -3.126291               | -1.036175 | -0.433425 |
| 9                | 6                | -2.730243               | 3.034320  | -0.503716 |
| 10               | 1                | -1.660263               | 3.092055  | -0.698427 |
| 11               | 1                | -2.924319               | 3.565199  | 0.433328  |
| 12               | 6                | -3.509741               | 3.661922  | -1.650843 |
| 13               | 1                | -3.226428               | 4.715647  | -1.717044 |
| 14               | 1                | -3.240981               | 3.184422  | -2.595932 |
| 15               | 6                | -4.894079               | -2.405150 | -0.103921 |
| 16               | 1                | -5.479854               | -3.296789 | 0.048139  |
| 17               | 6                | -5.007068               | 3.572862  | -1.424340 |
| 18               | 1                | -5.574824               | 3.977925  | -2.261413 |
| 19               | 1                | -5.314626               | 4.075644  | -0.508167 |
| 20               | 6                | -5.379005               | -1.118246 | -0.106924 |
| 21               | 6                | -3.497107               | -2.311832 | -0.313300 |
| 22               | 17               | -0.165458               | 0.858263  | -1.331991 |
| 23               | 17               | 2.512008                | -0.672249 | -2.617310 |
| 24               | 29               | 1.614258                | -0.409610 | -0.509324 |
| 25               | 16               | 5.567820                | -1.818817 | 1.328715  |
| 26               | 7                | 3.037810                | -1.617931 | 0.269244  |
| 27               | 7                | 4.282717                | 0.306393  | 0.332172  |
| 28               | 6                | 4.165363                | -1.084436 | 0.559237  |
| 29               | 7                | 3.126262                | 1.036231  | 0.433697  |
| 30               | 6                | 2.730701                | -3.034389 | 0.504132  |
| 31               | 1                | 1.660633                | -3.092421 | 0.698266  |
| 32               | 1                | 2.925412                | -3.565468 | -0.432675 |
| 33               | 6                | 3.509772                | -3.661548 | 1.651811  |
| 34               | 1                | 3.226569                | -4.715291 | 1.718181  |
| 35               | 1                | 3.240515                | -3.183805 | 2.596635  |
| 36               | 6                | 4.893931                | 2.405169  | 0.103348  |
| 37               | 1                | 5.479631                | 3.296779  | -0.049183 |
| 38               | 6                | 5.007191                | -3.572360 | 1.425950  |

|    |   |            |           |           |
|----|---|------------|-----------|-----------|
| 39 | 1 | 5.574626   | -3.977032 | 2.263431  |
| 40 | 1 | 5.315225   | -4.075447 | 0.510103  |
| 41 | 6 | 5.378910   | 1.118281  | 0.106688  |
| 42 | 6 | 3.497007   | 2.311867  | 0.313039  |
| 43 | 6 | -6.747952  | -0.663843 | 0.189087  |
| 44 | 6 | -6.997083  | 0.190830  | 1.271558  |
| 45 | 6 | -7.822236  | -1.165862 | -0.554051 |
| 46 | 6 | -8.301445  | 0.550700  | 1.589706  |
| 47 | 1 | -6.170316  | 0.562822  | 1.866433  |
| 48 | 6 | -9.126383  | -0.800150 | -0.232169 |
| 49 | 1 | -7.632217  | -1.830615 | -1.388932 |
| 50 | 6 | -9.368279  | 0.059515  | 0.837348  |
| 51 | 1 | -8.486305  | 1.209686  | 2.430394  |
| 52 | 1 | -9.952552  | -1.187126 | -0.817716 |
| 53 | 1 | -10.384477 | 0.342674  | 1.087483  |
| 54 | 6 | -2.536222  | -3.412111 | -0.454130 |
| 55 | 6 | -1.387570  | -3.259924 | -1.242723 |
| 56 | 6 | -2.782530  | -4.646959 | 0.161248  |
| 57 | 6 | -0.504972  | -4.321438 | -1.408578 |
| 58 | 1 | -1.200071  | -2.312164 | -1.732876 |
| 59 | 6 | -1.894426  | -5.705114 | -0.004253 |
| 60 | 1 | -3.662795  | -4.776288 | 0.780869  |
| 61 | 6 | -0.754554  | -5.546594 | -0.790829 |
| 62 | 1 | 0.375932   | -4.194226 | -2.027777 |
| 63 | 1 | -2.093042  | -6.653789 | 0.481662  |
| 64 | 1 | -0.066434  | -6.373869 | -0.924059 |
| 65 | 6 | 2.536055   | 3.412111  | 0.453667  |
| 66 | 6 | 2.782090   | 4.646774  | -0.162184 |
| 67 | 6 | 1.387584   | 3.260061  | 1.242550  |
| 68 | 6 | 1.893871   | 5.704870  | 0.003106  |
| 69 | 1 | 3.662223   | 4.776006  | -0.782011 |
| 70 | 6 | 0.504868   | 4.321506  | 1.408175  |
| 71 | 1 | 1.200298   | 2.312451  | 1.733072  |
| 72 | 6 | 0.754162   | 5.546479  | 0.789944  |
| 73 | 1 | 2.092277   | 6.653398  | -0.483182 |
| 74 | 1 | -0.375886  | 4.194404  | 2.027609  |
| 75 | 1 | 0.065943   | 6.373702  | 0.922990  |
| 76 | 6 | 6.747790   | 0.663776  | -0.189419 |
| 77 | 6 | 7.822268   | 1.166427  | 0.553022  |
| 78 | 6 | 6.996659   | -0.191684 | -1.271326 |
| 79 | 6 | 9.126342   | 0.800586  | 0.231004  |
| 80 | 1 | 7.632451   | 1.831778  | 1.387472  |
| 81 | 6 | 8.300952   | -0.551682 | -1.589614 |
| 82 | 1 | 6.169741   | -0.564187 | -1.865676 |
| 83 | 6 | 9.367978   | -0.059849 | -0.837956 |
| 84 | 1 | 9.952662   | 1.188057  | 0.816010  |
| 85 | 1 | 8.485603   | -1.211278 | -2.429870 |
| 86 | 1 | 10.384123  | -0.343106 | -1.088197 |

-----  
E(UTPSSh) = -7716.36155215 Hartree

Zero-point correction = 0.645903

Thermal correction to Energy = 0.697546

Thermal correction to Enthalpy = 0.698490

Thermal correction to Gibbs Free Energy = 0.547790

Sum of electronic and zero-point Energies = -7715.715649

Sum of electronic and thermal Energies = -7715.664006

Sum of electronic and thermal Enthalpies = -7715.663062

Sum of electronic and thermal Free Energies = -7715.813762

Table S16. Optimized Cartesian coordinates (Å) calculated for *trans*-  
 $[\{\text{CuCl}(\text{DPhPzTz})\}_2(\mu\text{-Cl}_2)]$  (TPSSH/TZVP; PCM = methanol; 0 Imaginary frequencies).

| Center<br>Number | Atomic<br>Number | Coordinates (Angstroms) |           |           |
|------------------|------------------|-------------------------|-----------|-----------|
|                  |                  | X                       | Y         | Z         |
| 1                | 6                | 2.438148                | 0.132404  | 3.195424  |
| 2                | 6                | 1.832332                | -1.785643 | 1.853231  |
| 3                | 1                | 2.689581                | -2.095853 | 1.248484  |
| 4                | 1                | 0.941932                | -1.906639 | 1.238711  |
| 5                | 6                | 1.720633                | -2.632258 | 3.111048  |
| 6                | 1                | 1.656758                | -3.680676 | 2.808130  |
| 7                | 1                | 0.803685                | -2.387412 | 3.652565  |
| 8                | 6                | 2.924995                | -2.458208 | 4.014546  |
| 9                | 1                | 3.855902                | -2.723010 | 3.514405  |
| 10               | 1                | 2.839793                | -3.031091 | 4.937479  |
| 11               | 6                | 1.371725                | 3.427531  | 2.908970  |
| 12               | 6                | 2.227385                | 3.625146  | 4.016273  |
| 13               | 1                | 2.374463                | 4.537102  | 4.570671  |
| 14               | 6                | 2.857077                | 2.428711  | 4.260963  |
| 15               | 6                | 0.458227                | 4.415772  | 2.329313  |
| 16               | 6                | -0.756595               | 4.030093  | 1.748724  |
| 17               | 1                | -1.014319               | 2.979188  | 1.689623  |
| 18               | 6                | -1.630494               | 4.991330  | 1.254067  |
| 19               | 1                | -2.571242               | 4.683106  | 0.811540  |
| 20               | 6                | -1.305293               | 6.345348  | 1.330598  |
| 21               | 1                | -1.989730               | 7.092267  | 0.944155  |
| 22               | 6                | -0.097919               | 6.735796  | 1.907750  |
| 23               | 1                | 0.163410                | 7.786256  | 1.967041  |
| 24               | 6                | 0.777029                | 5.778535  | 2.409806  |
| 25               | 1                | 1.718429                | 6.089397  | 2.848410  |
| 26               | 6                | 3.908818                | 2.155873  | 5.255472  |
| 27               | 6                | 3.647674                | 2.370408  | 6.613568  |
| 28               | 1                | 2.652239                | 2.660983  | 6.928925  |
| 29               | 6                | 4.658668                | 2.195694  | 7.554125  |
| 30               | 1                | 4.447432                | 2.355104  | 8.605269  |
| 31               | 6                | 5.936286                | 1.818777  | 7.145489  |
| 32               | 1                | 6.723159                | 1.684779  | 7.879101  |
| 33               | 6                | 6.204410                | 1.620256  | 5.791201  |
| 34               | 1                | 7.200607                | 1.339678  | 5.468966  |
| 35               | 6                | 5.198358                | 1.789189  | 4.847277  |
| 36               | 1                | 5.411135                | 1.645754  | 3.794142  |
| 37               | 17               | -1.293522               | 0.398934  | 1.049172  |
| 38               | 17               | 1.646234                | 2.871336  | -0.596104 |
| 39               | 29               | 1.288219                | 1.065055  | 0.765401  |
| 40               | 7                | 1.967480                | -0.344825 | 2.103330  |
| 41               | 7                | 2.365614                | 1.542174  | 3.322967  |
| 42               | 7                | 1.469649                | 2.163083  | 2.485456  |
| 43               | 16               | 3.071505                | -0.717129 | 4.602627  |
| 44               | 6                | -2.438148               | -0.132404 | -3.195424 |
| 45               | 6                | -1.832332               | 1.785643  | -1.853231 |
| 46               | 1                | -2.689581               | 2.095853  | -1.248484 |
| 47               | 1                | -0.941932               | 1.906639  | -1.238711 |
| 48               | 6                | -1.720633               | 2.632258  | -3.111048 |
| 49               | 1                | -1.656758               | 3.680676  | -2.808130 |
| 50               | 1                | -0.803685               | 2.387412  | -3.652565 |
| 51               | 6                | -2.924995               | 2.458208  | -4.014546 |
| 52               | 1                | -3.855902               | 2.723010  | -3.514405 |
| 53               | 1                | -2.839793               | 3.031091  | -4.937479 |
| 54               | 6                | -1.371725               | -3.427531 | -2.908970 |
| 55               | 6                | -2.227385               | -3.625146 | -4.016273 |
| 56               | 1                | -2.374463               | -4.537102 | -4.570671 |
| 57               | 6                | -2.857077               | -2.428711 | -4.260963 |
| 58               | 6                | -0.458227               | -4.415772 | -2.329313 |
| 59               | 6                | 0.756595                | -4.030093 | -1.748724 |
| 60               | 1                | 1.014319                | -2.979188 | -1.689623 |

|    |    |           |           |           |
|----|----|-----------|-----------|-----------|
| 61 | 6  | 1.630494  | -4.991330 | -1.254067 |
| 62 | 1  | 2.571242  | -4.683106 | -0.811540 |
| 63 | 6  | 1.305293  | -6.345348 | -1.330598 |
| 64 | 1  | 1.989730  | -7.092267 | -0.944155 |
| 65 | 6  | 0.097919  | -6.735796 | -1.907750 |
| 66 | 1  | -0.163410 | -7.786256 | -1.967041 |
| 67 | 6  | -0.777029 | -5.778535 | -2.409806 |
| 68 | 1  | -1.718429 | -6.089397 | -2.848410 |
| 69 | 6  | -3.908818 | -2.155873 | -5.255472 |
| 70 | 6  | -3.647674 | -2.370408 | -6.613568 |
| 71 | 1  | -2.652239 | -2.660983 | -6.928925 |
| 72 | 6  | -4.658668 | -2.195694 | -7.554125 |
| 73 | 1  | -4.447432 | -2.355104 | -8.605269 |
| 74 | 6  | -5.936286 | -1.818777 | -7.145489 |
| 75 | 1  | -6.723159 | -1.684779 | -7.879101 |
| 76 | 6  | -6.204410 | -1.620256 | -5.791201 |
| 77 | 1  | -7.200607 | -1.339678 | -5.468966 |
| 78 | 6  | -5.198358 | -1.789189 | -4.847277 |
| 79 | 1  | -5.411135 | -1.645754 | -3.794142 |
| 80 | 17 | 1.293522  | -0.398934 | -1.049172 |
| 81 | 17 | -1.646234 | -2.871336 | 0.596104  |
| 82 | 29 | -1.288219 | -1.065055 | -0.765401 |
| 83 | 7  | -1.967480 | 0.344825  | -2.103330 |
| 84 | 7  | -2.365614 | -1.542174 | -3.322967 |
| 85 | 7  | -1.469649 | -2.163083 | -2.485456 |
| 86 | 16 | -3.071505 | 0.717129  | -4.602627 |

-----  
E(UTPSSh) = -7716.36280222 Hartree

Zero-point correction = 0.646234

Thermal correction to Energy = 0.697687

Thermal correction to Enthalpy = 0.698631

Thermal correction to Gibbs Free Energy = 0.551203

Sum of electronic and zero-point Energies = -7715.716569

Sum of electronic and thermal Energies = -7715.665115

Sum of electronic and thermal Enthalpies = -7715.664171

Sum of electronic and thermal Free Energies = -7715.811599
